# Supplementary material
Source: PubMed Central journal article supplement (PMC2148298)
Supplement: pnas_0705478104_1.pdf [file pnas_0705478104_1.pdf]

**Table 3. Species of *Papilio* used in this study, host plants, larval morphology, host growth form, and host leaf size**

| Species                | Host plants                                                                                                                                                                                                                                                                                                                                                                                                                                                                                                                                                                                                                                                                                                                                                                                                          | Larval morphology                   | Host growth form(s) | Host leaf size(s) |
|------------------------|----------------------------------------------------------------------------------------------------------------------------------------------------------------------------------------------------------------------------------------------------------------------------------------------------------------------------------------------------------------------------------------------------------------------------------------------------------------------------------------------------------------------------------------------------------------------------------------------------------------------------------------------------------------------------------------------------------------------------------------------------------------------------------------------------------------------|-------------------------------------|---------------------|-------------------|
| <i>Papilio aegaeus</i> | <i>Citrus australasica</i> , <i>Citrus australis</i> , <i>Citrus garrawayae</i> , <i>Citrus inodora</i> , <i>Clausena brevistyla</i> , <i>Dinosperma erythrocoeca</i> , <i>Dinosperma melanophloia</i> , <i>Eriostemon australasius</i> , <i>Flindersia australis</i> , <i>Flindersia bennettii</i> , <i>Flindersia collina</i> , <i>Flindersia ifflaiana</i> , <i>Flindersia laevicarpa</i> , <i>Flindersia oppositifolia</i> , <i>Flindersia pimenteliana</i> , <i>Flindersia schottiana</i> , <i>Geijera salicifolia</i> , <i>Geijera parviflora</i> , <i>Halfordia</i> spp, <i>Leonema ambiens</i> , <i>Leonema dentatum</i> , <i>Micromelum minutum</i> , <i>Philotheca myoporoides</i> , <i>Zanthoxylum brachyachanthum</i> , <i>Zanthoxylum nitidum</i> , <i>Zieria laevigata</i> , <i>Zieria smithii</i> (2) | Cryptic (1, 11)                     | Tree, Shrub         | Narrow, Wide      |
| <i>P. alexanor</i>     | <i>Opopanax chironium</i> , <i>Opopanax hispidus</i> , <i>Seseli montanum</i> , <i>Pimpinella saxifraga</i> , <i>Ptychotis saxifraga</i> ( <i>heterophylla</i> ), <i>Scaligeria cretica</i> ( <i>napiformis</i> ), <i>Ferula communis</i> , <i>Pastinaca sativa</i> , <i>Trinia glauca</i> ( <i>vulgaris</i> ), <i>Seseli dioicum</i> , <i>Falcaria vulgaris</i> , <i>Seseli libanotis</i> , <i>Torilis heterophylla</i> , <i>Ferula karategina</i> , <i>Ferula ugamica</i> (20, 21, 23)                                                                                                                                                                                                                                                                                                                             | Aposematic (11)                     | Herb, Shrub         | Narrow, Wide      |
| <i>P. anactus</i>      | <i>Citrus australasica</i> , <i>Citrus australis</i> , <i>Citrus garrawayae</i> , <i>Citrus glauca</i> , <i>Citrus inodora</i> , <i>Geijera parviflora</i> , <i>Citrus</i> ( <i>Microcitrus</i> ) <i>australis</i> , <i>Citrus</i> ( <i>Microcitrus</i> ) <i>australasica</i> , <i>Eremocitrus glauca</i> (2, 12)                                                                                                                                                                                                                                                                                                                                                                                                                                                                                                    | Aposematic (2, 12, 16)              | Shrub, Tree         | Narrow, Wide      |
| <i>P. anchisiades</i>  | <i>Citrus sinensis</i> , <i>Citrus aurantiaca</i> , <i>Citrus limon</i> , <i>Zanthoxylum setulosum</i> , <i>Zanthoxylum elephantiasis</i> , <i>Zanthoxylum fagara</i> , <i>Zanthoxylum americanum</i> , <i>Zanthoxylum clava-herculis</i> , <i>Zanthoxylum reticulata</i> , <i>Zanthoxylum rhoifolium</i> , <i>Zanthoxylum latispinosum</i> , <i>Choisya dumosa</i> , <i>Ruta graveolens</i> , <i>Esenbeckia leiocarpa</i> , <i>Esenbeckia febrifuga</i> (24)                                                                                                                                                                                                                                                                                                                                                        | Bird dropping mimic (8, 11, 17, 24) | Tree, Shrub         | Narrow, Wide      |
| <i>P. astyalus</i>     | <i>Esenbeckia leiocarpa</i> , <i>Esenbeckia febrifuga</i> , <i>Citrus limon</i> , <i>Citrus sinensis</i> , <i>Citrus reticulata</i> (24)                                                                                                                                                                                                                                                                                                                                                                                                                                                                                                                                                                                                                                                                             | Bird dropping mimic (24)            | Tree, Shrub         | Wide              |

| Species                            | Host plants                                                                                                                                                                                                                                                                                                                                                                                                                                                                                                                                                                                                                                                        | Larval morphology        | Host growth form(s) | Host leaf size(s) |
|------------------------------------|--------------------------------------------------------------------------------------------------------------------------------------------------------------------------------------------------------------------------------------------------------------------------------------------------------------------------------------------------------------------------------------------------------------------------------------------------------------------------------------------------------------------------------------------------------------------------------------------------------------------------------------------------------------------|--------------------------|---------------------|-------------------|
| <i>P. bianor</i>                   | <i>Citrus tachibana</i> , <i>Citrus junos</i> , <i>Citrus depressa</i> , <i>Evodia glauca</i> , <i>Orixa japonica</i> , <i>Zanthoxylum ailanthoides</i> , <i>Zanthoxylum shinifolium</i> , <i>Zanthoxylum piperitum</i> , <i>Zanthoxylum alatum</i> (armatum), <i>Zanthoxylum oxyphyllum</i> , <i>Zanthoxylum acanthopodium</i> , <i>Zanthoxylum rhetsa</i> (budrunge), <i>Clausena willdenovii</i> , <i>Phellodendron amurense</i> , <i>Skimmia japonica</i> , <i>Poncirus trifoliata</i> (11), <i>Zanthoxylum nitidum</i> , <i>Euodia lepta</i> , <i>Euodia danielli</i> , <i>Euodia glabrifolia</i> , <i>Citrus microcarpa</i> (13), <i>Rhus hypoleuca</i> (15) | Startle response (1, 11) | Tree, Shrub         | Wide              |
| <i>P. birchalli</i>                | <i>Hernandia didymanthera</i> (24)                                                                                                                                                                                                                                                                                                                                                                                                                                                                                                                                                                                                                                 | Startle response (24)    | Tree                | Wide              |
| <i>P. canadensis</i>               | <i>Prunus cerasus</i> , <i>Prunus serotina</i> , <i>Prunus pennsylvanica</i> , <i>Prunus virginiana</i> , <i>Prunus persica</i> , <i>Amelanchier canadensis</i> , <i>Crataegus spp</i> , <i>Malus pumila</i> , <i>Sorbus americana</i> , <i>Populus balsamifera</i> , <i>Populus tremuloides</i> , <i>Populus grandidentata</i> , <i>Betula alba</i> , <i>Betula lenta</i> , <i>Betula allegheniensis</i> , <i>Betula papyrifera</i> , <i>Corylus spp</i> , <i>Alnus rugosa</i> , <i>Acer spp</i> , <i>Carya spp</i> , <i>Ulmus spp</i> , <i>Tilia americana</i> , <i>Fraxinus americana</i> , <i>Fraxinus pennsylvanica</i> , <i>Syringa vulgaris</i> (18)        | Startle response (18)    | Tree, Shrub         | Wide              |
| <i>P. clytia</i>                   | <i>Cinnamomum iners</i> , <i>Litsea sebifera</i> , <i>Litsea glutinosa</i> , <i>Cryptocarya amygdalina</i> (11, 12, 22)                                                                                                                                                                                                                                                                                                                                                                                                                                                                                                                                            | Aposematic (6, 11)       | Tree                | Wide              |
| <i>P. constantinus</i>             | <i>Clausena spp</i> , <i>Teclea spp</i> (25)                                                                                                                                                                                                                                                                                                                                                                                                                                                                                                                                                                                                                       | Startle response (14)    | Tree, Shrub         | Wide              |
| <i>P. crespontes</i>               | <i>Casimiroa edulis</i> , <i>Ptelea trifoliata</i> , <i>Zanthoxylum setulosum</i> , <i>Zanthoxylum elephantiasis</i> , <i>Zanthoxylum fagara</i> , <i>Zanthoxylum americanum</i> , <i>Zanthoxylum clava-herculis</i> , <i>Amyris elemifera</i> , <i>Citrus sinensis</i> , <i>Citrus limon</i> , <i>Citrus aurantium</i> , <i>Citrus grandis</i> , <i>Zanthoxylum hirsutum</i> , <i>Dictamnus albus</i> , <i>Choisya spp</i> , <i>Piper spp</i> (18, 24)                                                                                                                                                                                                            | Bird dropping mimic (24) | Tree, Shrub         | Wide              |
| <i>P. dardanus</i>                 | <i>Teclea simplicifolia</i> , <i>Teclea nobilis</i> , <i>Teclea stuhlmanni</i> , <i>Teclea villosa</i> , <i>Toddalia asiatica</i> , <i>Vespris eugeniifolia</i> (25)                                                                                                                                                                                                                                                                                                                                                                                                                                                                                               | Startle response (16)    | Shrub, Tree         | Wide              |
| <i>P. delalandei</i>               |                                                                                                                                                                                                                                                                                                                                                                                                                                                                                                                                                                                                                                                                    | Startle response (16)    |                     |                   |
| <i>P. demodocus</i> (Kenya)        | <i>Caledendron capensis</i> , <i>Clausena anisata</i> , <i>Clausena inaequalis</i> , <i>Fagaropsis angolensis</i> , <i>Citrus spp</i> , <i>Toddalia asiatica</i> , <i>Pseudospondias microcarpa</i> (25)                                                                                                                                                                                                                                                                                                                                                                                                                                                           | Startle response (5, 26) | Tree, Shrub         | Wide              |
| <i>P. demodocus</i> (South Africa) | <i>Foeniculum vulgare</i> (26)                                                                                                                                                                                                                                                                                                                                                                                                                                                                                                                                                                                                                                     | Aposematic (26)          | Herb                | Narrow            |

| Species                      | Host plants                                                                                                                                                                                                                                                                                                                                                                                                                                                                                                                                                                                                                                                                                                                                                                             | Larval morphology         | Host growth form(s) | Host leaf size(s) |
|------------------------------|-----------------------------------------------------------------------------------------------------------------------------------------------------------------------------------------------------------------------------------------------------------------------------------------------------------------------------------------------------------------------------------------------------------------------------------------------------------------------------------------------------------------------------------------------------------------------------------------------------------------------------------------------------------------------------------------------------------------------------------------------------------------------------------------|---------------------------|---------------------|-------------------|
| <i>P. demoleus malayanus</i> | <i>Clausena excavata (lanulata)</i> , <i>Citrus australis</i> , <i>Citrus grandis</i> , <i>Citrus deliciosa</i> , <i>Citrus limon</i> , <i>Zanthoxylum nitidum</i> , <i>Zanthoxylum cuspidata</i> , <i>Aegle marmelos</i> (11).                                                                                                                                                                                                                                                                                                                                                                                                                                                                                                                                                         | Startle response (11, 13) | Tree, Shrub         | Wide              |
| <i>P. demoleus sthenelus</i> | <i>Cullen australasicum</i> , <i>Cullen badoconum</i> , <i>Cullen balsamicum</i> , <i>Cullen cinereum</i> , <i>Cullen patens</i> , <i>Cullen pustulatum</i> , <i>Cullen tenax</i> , <i>Citrus australis</i> (2)                                                                                                                                                                                                                                                                                                                                                                                                                                                                                                                                                                         | Aposematic (2)            | Shrub, Herb         | Narrow, Wide      |
| <i>P. epiphorbas</i>         |                                                                                                                                                                                                                                                                                                                                                                                                                                                                                                                                                                                                                                                                                                                                                                                         | Startle response (16)     |                     |                   |
| <i>P. epycides</i>           | <i>Cinnamomum camphora</i> (12), <i>Cinnamomum inunctum</i> (28)                                                                                                                                                                                                                                                                                                                                                                                                                                                                                                                                                                                                                                                                                                                        | Cryptic (11, 12)          | Tree                | Wide              |
| <i>P. erithonioides</i>      |                                                                                                                                                                                                                                                                                                                                                                                                                                                                                                                                                                                                                                                                                                                                                                                         |                           |                     |                   |
| <i>P. erostratus</i>         | <i>Citrus limon</i> , <i>Citrus sinensis</i> , <i>Citrus aurantiaca</i> (24)                                                                                                                                                                                                                                                                                                                                                                                                                                                                                                                                                                                                                                                                                                            | Bird dropping mimic (16)  | Tree, Shrub         | Wide              |
| <i>P. esperanza</i>          | <i>Magnolia dealbata</i> (24)                                                                                                                                                                                                                                                                                                                                                                                                                                                                                                                                                                                                                                                                                                                                                           | Startle response (24)     | Tree                | Wide              |
| <i>P. garamas</i>            | <i>Persea rufescens</i> , <i>Persea americana</i> , <i>Magnolia dealbata</i> (24)                                                                                                                                                                                                                                                                                                                                                                                                                                                                                                                                                                                                                                                                                                       | Startle response (24)     | Tree                | Wide              |
| <i>P. glaucus</i>            | <i>Prunus cerasus</i> , <i>Prunus domestica</i> , <i>Prunus americana</i> , <i>Prunus serotina</i> , <i>Prunus pennsylvanica</i> , <i>Prunus virginiana</i> , <i>Crataegus spp.</i> , <i>Malus pumila</i> , <i>Cydonia oblonga</i> , <i>Populus tremuloides</i> , <i>Populus deltoides</i> , <i>Carpinus caroliniana</i> , <i>Alnus incana</i> , <i>Carya spp.</i> , <i>Catalpa bignonioides</i> , <i>Liriodendron tulipifera</i> , <i>Magnolia acuminata</i> , <i>Magnolia virginiana</i> , <i>Cinnamomum camphora</i> , <i>Lindera benzoin</i> , <i>Sassafras albidum</i> , <i>Fraxinus americana</i> , <i>Fraxinus nigra</i> , <i>Fraxinus caroliniana</i> , <i>Fraxinus pennsylvanica</i> , <i>Syringa vulgaris</i> , <i>Ptelea trifoliata</i> , <i>Zanthoxylum americanum</i> (18) | Startle response (11, 24) | Tree, Shrub         | Wide              |
| <i>P. grosesmithi</i>        |                                                                                                                                                                                                                                                                                                                                                                                                                                                                                                                                                                                                                                                                                                                                                                                         |                           |                     |                   |
| <i>P. hectorides</i>         | <i>Citrus limon</i> , <i>Citrus sinensis</i> , <i>Citrus reticulata</i> , <i>Zanthoxylum rhoifolium</i> , <i>Euxylophora paraensis</i> , <i>Helietta spp.</i> , <i>Piper amalago</i> , <i>Piper xylosteoides</i> (24)                                                                                                                                                                                                                                                                                                                                                                                                                                                                                                                                                                   | Bird dropping mimic (24)  | Tree, Shrub         | Wide              |

| Species             | Host plants                                                                                                                                                                                                                                                                                                                                                                                                                                                                                                                                                                                                                                                                                                                                                                                                                                                                                                          | Larval morphology     | Host growth form(s) | Host leaf size(s) |
|---------------------|----------------------------------------------------------------------------------------------------------------------------------------------------------------------------------------------------------------------------------------------------------------------------------------------------------------------------------------------------------------------------------------------------------------------------------------------------------------------------------------------------------------------------------------------------------------------------------------------------------------------------------------------------------------------------------------------------------------------------------------------------------------------------------------------------------------------------------------------------------------------------------------------------------------------|-----------------------|---------------------|-------------------|
| <i>P. helenus</i>   | <i>Zanthoxylum rhetsa</i> , <i>Zanthoxylum nitidum</i> ,<br><i>Zanthoxylum avicennae</i> , <i>Zanthoxylum ailanthoides</i> ,<br><i>Citrus junos</i> , <i>Citrus natsudaidai</i> , <i>Citrus unshiu</i> , <i>Citrus tachibana</i> , <i>Phellodendron amurense</i> , <i>Evodia glauca</i> ,<br><i>Poncirus trifoliata</i> , <i>Toddalia asiatica</i> , <i>Citrus aurantium</i> , <i>Citrus reticulata</i> , <i>Citrus grandis</i> , <i>Citrus depressa</i> , <i>Zanthoxylum cuspidatum</i> , <i>Zanthoxylum myriacanthum</i> , <i>Zanthoxylum scandens</i> , <i>Atalantia buxifolia</i> , <i>Clausena lansium</i> , <i>Euodia glabrifolia</i> ,<br><i>Glycosmis parviflora</i> ( <i>pentaphylla</i> ), <i>Citrus limonia</i> ( <i>medica</i> ), <i>Citrus paradisi</i> , <i>Citrus sinensis</i> , <i>Citrus maxima</i> , <i>Citrus microcarpa</i> , <i>Fortunella japonica</i> ,<br><i>Fortunella hindsii</i> (11, 13) | Startle response (11) | Tree, Shrub         | Wide              |
| <i>P. hipponous</i> |                                                                                                                                                                                                                                                                                                                                                                                                                                                                                                                                                                                                                                                                                                                                                                                                                                                                                                                      | Cryptic (16)          |                     |                   |
| <i>P. hospiton</i>  | <i>Ferula communis</i> , <i>Peucedanum paniculatum</i> , <i>Ruta corsica</i> (21)                                                                                                                                                                                                                                                                                                                                                                                                                                                                                                                                                                                                                                                                                                                                                                                                                                    | Aposematic (9)        | Herb, Shrub         | Narrow            |
| <i>P. indra</i>     | <i>Cymopterus purpurea</i> , <i>Cymopterus panamintensis</i> ,<br><i>Aletes acaulis</i> , <i>Harbouria tracypleura</i> , <i>Lomatium lucidum</i> , <i>Lomatium parryi</i> , <i>Lomatium nuttallii</i> ,<br><i>Lomatium eastwoodi</i> , <i>Lomatium marginatum</i> ,<br><i>Lomatium scabrum</i> , <i>Lomatium latilobum</i> , <i>Lomatium junceum</i> , <i>Lomatium grayi</i> , <i>Lomatium triternatum</i> ,<br><i>Lomatium dissectum</i> , <i>Pteryxia hendersonii</i> , <i>Pteryxia petraea</i> , <i>Pteryxia terebinthina</i> , <i>Tauschia parishii</i> ,<br><i>Tauschia arguta</i> , <i>Thamnosma montana</i> (18)                                                                                                                                                                                                                                                                                              | Aposematic (24)       | Herb, Shrub         | Narrow, Wide      |
| <i>P. lormieri</i>  | <i>Zanthoxylum gillettii</i> (Syn: <i>Fagara macrophylla</i> ),<br><i>Citrus spp</i> , <i>Vepris spp</i> , <i>Clausena anisata</i> (27)                                                                                                                                                                                                                                                                                                                                                                                                                                                                                                                                                                                                                                                                                                                                                                              |                       | Shrub, Tree         | Wide              |
| <i>P. maackii</i>   | <i>Phellodendron amurense</i> , <i>Zanthoxylum ailanthoides</i> ,<br><i>Evodia glauca</i> , <i>Orixa japonica</i> (11)                                                                                                                                                                                                                                                                                                                                                                                                                                                                                                                                                                                                                                                                                                                                                                                               | Startle response (11) | Tree, Shrub         | Wide              |

| Species                       | Host plants                                                                                                                                                                                                                                                                                                                                                                                                                                                                                                                                                                                                                                                                                                                                                                                                                                                                                                                                                                                                                                                                                        | Larval morphology        | Host growth form(s)  | Host leaf size(s) |
|-------------------------------|----------------------------------------------------------------------------------------------------------------------------------------------------------------------------------------------------------------------------------------------------------------------------------------------------------------------------------------------------------------------------------------------------------------------------------------------------------------------------------------------------------------------------------------------------------------------------------------------------------------------------------------------------------------------------------------------------------------------------------------------------------------------------------------------------------------------------------------------------------------------------------------------------------------------------------------------------------------------------------------------------------------------------------------------------------------------------------------------------|--------------------------|----------------------|-------------------|
| <i>P. machaon</i>             | <i>Foeniculum vulgare</i> , <i>Peucedanum palustre</i> ,<br><i>Peucedanum cervaria</i> , <i>Peucedanum oreoselinum</i> ,<br><i>Peucedanum officinale</i> , <i>Trinia glauca</i> , <i>Laserpitium halleri</i> , <i>Laserpitium latifolium</i> , <i>Angelica sylvestris</i> ,<br><i>Angelica archangelica</i> , <i>Carum carvi</i> , <i>Aegopodium podagraria</i> , <i>Anethum graveolens</i> , <i>Pimpinella saxifraga</i> , <i>Ammi visnaga</i> , <i>Ridolfia segetum</i> , <i>Silaum silaus</i> , <i>Daucus carota</i> , <i>Seseli varium</i> , <i>Seseli libanotis</i> ,<br><i>Bupleurum fruticosum</i> , <i>Bupleurum falcatum</i> ,<br><i>Petroselinum crispum</i> , <i>Crithmum maritimum</i> , <i>Ferula communis</i> , <i>Falcaria vulgaris</i> , <i>Meum athamanticum</i> ,<br><i>Sleinum carvifolia</i> , <i>Levisticum officinale</i> , <i>Heracleum sphondylium</i> , <i>Dictamnus albus</i> , <i>Ruta graveolens</i> , <i>Ruta angustifolia</i> , <i>Ruta chalepensis</i> , <i>Haplophyllum balcanicum</i> , <i>Haplophyllum tuberculatum</i> ,<br><i>Haplophyllum linifolium</i> (21) | Aposematic (11, 21)      | Herb, Shrub          | Narrow, Wide      |
| <i>P. machaon hippocrates</i> | <i>Angelica archangelica</i> , <i>Daucus carota</i> , <i>Foeniculum vulgare</i> , <i>Heracleum lanatum</i> , <i>Pastinaca sativa</i> (19)                                                                                                                                                                                                                                                                                                                                                                                                                                                                                                                                                                                                                                                                                                                                                                                                                                                                                                                                                          | Aposematic (16)          | Herb                 | Narrow, Wide      |
| <i>P. machaon oregonius</i>   | <i>Artemisia norvegica</i> , <i>Artemisia dracunculus</i> ,<br><i>Heracleum lanatum</i> , <i>Zizia aptera</i> (18)                                                                                                                                                                                                                                                                                                                                                                                                                                                                                                                                                                                                                                                                                                                                                                                                                                                                                                                                                                                 | Aposematic (24)          | Shrub, Herb          | Narrow, Wide      |
| <i>P. macilentus</i>          | <i>Orixa japonica</i> , <i>Zanthoxylum schinifolium</i> ,<br><i>Zanthoxylum ailanthoides</i> , <i>Zanthoxylum piperitum</i> ,<br><i>Poncirus trifoliata</i> , <i>Ruta graveolens</i> (11)                                                                                                                                                                                                                                                                                                                                                                                                                                                                                                                                                                                                                                                                                                                                                                                                                                                                                                          | Startle response (11)    | Tree, Shrub,<br>Herb | Narrow, Wide      |
| <i>P. memnon</i>              | <i>Paramignya griffithii</i> , <i>Citrus natsudaoidai</i> , <i>Citrus grandis</i> , <i>Citrus sinensis</i> , <i>Citrus unshiu</i> , <i>Citrus junos</i> ,<br><i>Fortunella japonica</i> , <i>Poncirus trifoliata</i> (11)                                                                                                                                                                                                                                                                                                                                                                                                                                                                                                                                                                                                                                                                                                                                                                                                                                                                          | Startle response (6, 11) | Tree, Shrub          | Wide              |
| <i>P. morondavana</i>         |                                                                                                                                                                                                                                                                                                                                                                                                                                                                                                                                                                                                                                                                                                                                                                                                                                                                                                                                                                                                                                                                                                    |                          |                      |                   |
| <i>P. multicaudatus</i>       | <i>Prunus virginiana</i> , <i>Prunus americana</i> , <i>Prunus emarginata</i> , <i>Prunus cerasus</i> , <i>Prunus capuli</i> ,<br><i>Amelanchier spp</i> , <i>Vauquelinia californica</i> , <i>Fraxinus oregonius</i> , <i>Fraxinus latifolia</i> , <i>Fraxinus anomala</i> ,<br><i>Fraxinus viridis</i> , <i>Fraxinus pennsylvanica</i> , <i>Ligustrum lucidum</i> , <i>Ligustrum vulgare</i> , <i>Ptelea trifoliata</i> , <i>Ptelea baldwinii</i> , <i>Ptelea crenulata</i> , <i>Platanus racemosa</i> (18)                                                                                                                                                                                                                                                                                                                                                                                                                                                                                                                                                                                      | Startle response (24)    | Tree, Shrub          | Wide              |
| <i>P. nephelus</i>            | <i>Zanthoxylum ovalifolium</i> , <i>Zanthoxylum rhetsa</i> , <i>Citrus spp</i> , <i>Toddalia asiatica</i> , <i>Clausena willdenovii</i> ,<br><i>Micromelum minutum</i> , <i>Zanthoxylum ailanthoides</i> ,<br><i>Euodia glauca</i> (11, 13)                                                                                                                                                                                                                                                                                                                                                                                                                                                                                                                                                                                                                                                                                                                                                                                                                                                        | Startle response (11)    | Tree                 | Wide              |
| <i>P. nobilis</i>             | <i>Warburgia ugandensis</i> (25)                                                                                                                                                                                                                                                                                                                                                                                                                                                                                                                                                                                                                                                                                                                                                                                                                                                                                                                                                                                                                                                                   | Startle response (3)     | Tree                 | Wide              |
| <i>P. oribazus</i>            |                                                                                                                                                                                                                                                                                                                                                                                                                                                                                                                                                                                                                                                                                                                                                                                                                                                                                                                                                                                                                                                                                                    | Startle response (16)    |                      |                   |
| <i>P. palamedes</i>           | <i>Persea borbonia</i> , <i>Sassafras albidum</i> (18)                                                                                                                                                                                                                                                                                                                                                                                                                                                                                                                                                                                                                                                                                                                                                                                                                                                                                                                                                                                                                                             | Startle response (18)    | Tree, Shrub          | Wide              |

| Species             | Host plants                                                                                                                                                                                                                                                                                                                                                                                                                                                                                                                                                                                                                                                                                                                                                                                                                                                                                                                                                                                                                                               | Larval morphology        | Host growth form(s) | Host leaf size(s) |
|---------------------|-----------------------------------------------------------------------------------------------------------------------------------------------------------------------------------------------------------------------------------------------------------------------------------------------------------------------------------------------------------------------------------------------------------------------------------------------------------------------------------------------------------------------------------------------------------------------------------------------------------------------------------------------------------------------------------------------------------------------------------------------------------------------------------------------------------------------------------------------------------------------------------------------------------------------------------------------------------------------------------------------------------------------------------------------------------|--------------------------|---------------------|-------------------|
| <i>P. paris</i>     | <i>Zanthoxylum nitidum</i> , <i>Zanthoxylum armatum</i> ,<br><i>Zanthoxylum ovalifolium</i> , <i>Zanthoxylum avicennae</i> ,<br><i>Evodia merrillii</i> , <i>Evodia roxburghiana</i> , <i>Evodia glauca</i> , <i>Toddalia asiatica</i> , <i>Evodia semecarpifolia</i> ,<br><i>Evodia lepta</i> (11, 13)                                                                                                                                                                                                                                                                                                                                                                                                                                                                                                                                                                                                                                                                                                                                                   | Startle response (11)    | Tree, Shrub         | Wide              |
| <i>P. phorcas</i>   | <i>Teclea simplicifolia</i> , <i>Teclea nobilis</i> , <i>Teclea villosa</i> ,<br><i>Citrus</i> spp. (4, 25)                                                                                                                                                                                                                                                                                                                                                                                                                                                                                                                                                                                                                                                                                                                                                                                                                                                                                                                                               |                          | Tree, Shrub         | Wide              |
| <i>P. pilumnus</i>  | <i>Litsea glaucescens</i> (24)                                                                                                                                                                                                                                                                                                                                                                                                                                                                                                                                                                                                                                                                                                                                                                                                                                                                                                                                                                                                                            | Startle response (24)    | Tree, Shrub         | Wide              |
| <i>P. polytes</i>   | <i>Glycosmis parviflora</i> ( <i>pentaphylla</i> ), <i>Glycosmis cochinchinensis</i> , <i>Aegle marmelos</i> , <i>Murraya exotica</i> ( <i>paniculata</i> ), <i>Murraya koenigii</i> , <i>Triphasia trifolia</i> ,<br><i>Zanthoxylum armatum</i> ( <i>alatum</i> ), <i>Zanthoxylum nitidum</i> , <i>Zanthoxylum cuspidata</i> , <i>Citrus grandis</i> ,<br><i>Citrus deliciosa</i> , <i>Citrus limon</i> , <i>Toddalia asiatica</i> ,<br><i>Evodia glauca</i> , <i>Clausena excavata</i> , <i>Atalantia spinosa</i> ,<br><i>Poncirus trifoliata</i> (11)                                                                                                                                                                                                                                                                                                                                                                                                                                                                                                  | Startle response (1, 11) | Tree, Shrub         | Wide              |
| <i>P. polyxenes</i> | <i>Angelica ampla</i> , <i>Angelica atropurpurea</i> , <i>Angelica venenosa</i> , <i>Anethum graveolens</i> , <i>Apium graveolens</i> ,<br><i>Conium maculatum</i> , <i>Daucus pusillus</i> , <i>Daucus carota</i> ,<br><i>Cryptotaenia canadensis</i> , <i>Foeniculum vulgare</i> ,<br><i>Harbouria trachipleura</i> , <i>Heracleum lanatum</i> ,<br><i>Levisticum officinale</i> , <i>Ligusticum scoticum</i> , <i>Berula erecta</i> , <i>Osmorhiza longistylis</i> , <i>Oxypolis canbyi</i> ,<br><i>Pastinaca sativa</i> , <i>Petroselinum crispum</i> , <i>Ptilimnium capillaceum</i> , <i>Carum carvi</i> , <i>Cicuta maculata</i> , <i>Cicuta bulbifera</i> , <i>Cicuta douglasii</i> , <i>Sium suave</i> , <i>Spermolepis divaricata</i> , <i>Taenidia integerrima</i> , <i>Thaspium barbinode</i> , <i>Zizia aurea</i> , <i>Zizia aptera</i> , <i>Cymopterus panamintensis</i> , <i>Tauschia parishii</i> , <i>Tauschia arguta</i> ,<br><i>Thamnosma texana</i> , <i>Thamnosma montana</i> , <i>Ruta graveolens</i> , <i>Dictamnus albus</i> (18) | Aposematic (11, 24)      | Herb                | Narrow, Wide      |
| <i>P. protenor</i>  | <i>Citrus junos</i> , <i>Citrus unshiu</i> , <i>Citrus natsudaidai</i> , <i>Citrus grandis</i> , <i>Citrus limon</i> , <i>Citrus deliciosa</i> , <i>Poncirus trifoliata</i> , <i>Zanthoxylum piperitum</i> , <i>Zanthoxylum beecheyanum</i> , <i>Zanthoxylum nitidum</i> , <i>Zanthoxylum armatum</i> ( <i>alatum planispinum</i> ), <i>Zanthoxylum acanthopodium</i> , <i>Zanthoxylum oxyphyllum</i> ,<br><i>Zanthoxylum schinifolium</i> , <i>Zanthoxylum ailanthoides</i> ,<br><i>Zanthoxylum cuspidata</i> , <i>Skimmia japonica</i> , <i>Evodia rutaecarpa</i> , <i>Evodia glauca</i> , <i>Fortunella japonica</i> ,<br><i>Toddalia asiatica</i> (11)                                                                                                                                                                                                                                                                                                                                                                                                | Startle response (11)    | Tree, Shrub         | Wide              |

| Species              | Host plants                                                                                                                                                                                                                                                                                                                                                                                                                                                                                                                                                                                                                                                                                                                                                                                                                                                | Larval morphology           | Host growth form(s)     | Host leaf size(s) |
|----------------------|------------------------------------------------------------------------------------------------------------------------------------------------------------------------------------------------------------------------------------------------------------------------------------------------------------------------------------------------------------------------------------------------------------------------------------------------------------------------------------------------------------------------------------------------------------------------------------------------------------------------------------------------------------------------------------------------------------------------------------------------------------------------------------------------------------------------------------------------------------|-----------------------------|-------------------------|-------------------|
| <i>P. rex</i>        | <i>Teclea tricarpa</i> , <i>Teclea stuhlmanni</i> , <i>Calodendron</i> spp, <i>Vepris</i> spp (10, 25)                                                                                                                                                                                                                                                                                                                                                                                                                                                                                                                                                                                                                                                                                                                                                     |                             | Tree, Shrub             | Wide              |
| <i>P. rumanzovia</i> | <i>Citrus</i> spp (11, 22)                                                                                                                                                                                                                                                                                                                                                                                                                                                                                                                                                                                                                                                                                                                                                                                                                                 | Startle response (11)       | Tree, Shrub             | Wide              |
| <i>P. rutulus</i>    | <i>Prunus cerasus</i> , <i>Prunus domestica</i> , <i>Prunus americana</i> , <i>Prunus virginiana</i> , <i>Prunus persica</i> , <i>Prunus emarginata</i> , <i>Prunus ilicifolia</i> , <i>Prunus armeniaca</i> , <i>Prunus caroliniana</i> , <i>Malus pumila</i> , <i>Populus balsamifera</i> , <i>Populus tremuloides</i> , <i>Populus trichocarpa</i> , <i>Populus angustifolia</i> , <i>Salix lasiolepis</i> , <i>Salix lasiandra</i> , <i>Salix scouleriana</i> , <i>Salix exigua</i> , <i>Salix babylonica</i> , <i>Salix hookeriana</i> , <i>Betula papyrifera</i> , <i>Alnus tenuifolia</i> , <i>Alnus viridis</i> , <i>Alnus crispa</i> , <i>Alnus rubra</i> , <i>Acer</i> spp, <i>Carya</i> spp, <i>Ulmus</i> spp, <i>Platanus racemosa</i> , <i>Persea americana</i> , <i>Fraxinus</i> spp, <i>Syringa vulgaris</i> , <i>Ptelea baldwinii</i> (18) | Startle response (18)       | Tree, Shrub             | Wide              |
| <i>P. scamander</i>  | <i>Persea rufescens</i> , <i>Persea americana</i> , <i>Persea rigida</i> , <i>Nectandra</i> spp, <i>Ocotea pretiosa</i> , <i>Cryptocarya aschersoniana</i> , <i>Talauma ovata</i> , <i>Syngonium podophyllum</i> (24)                                                                                                                                                                                                                                                                                                                                                                                                                                                                                                                                                                                                                                      | Startle response (24)       | Tree, Shrub, Vine       | Wide              |
| <i>P. thoas</i>      | <i>Esenbeckia leiocarpa</i> , <i>Esenbeckia febrifuga</i> , <i>Citrus limon</i> , <i>Citrus sinensis</i> , <i>Citrus reticulata</i> , <i>Zanthoxylum setulosum</i> , <i>Zanthoxylum rhoifolium</i> , <i>Zanthoxylum latispinosum</i> , <i>Zanthoxylum elephantiasis</i> , <i>Zanthoxylum fagara</i> , <i>Zanthoxylum americanum</i> , <i>Zanthoxylum clava-herculis</i> , <i>Ruta graveolens</i> , <i>Piper amalago</i> , <i>Piper xylostoides</i> , <i>Piper marginatum</i> , <i>Piper karberi</i> , <i>Piper auritum</i> , <i>Piper tuberculatum</i> , <i>Piper sancti-felicis</i> , <i>Piper reticulatum</i> , <i>Piper multiplinervium</i> , <i>Piper aduncum</i> , <i>Pothomorphe peltata</i> , <i>Syngonium podophyllum</i> , <i>Ptelea</i> spp (18, 24)                                                                                             | Bird dropping mimic (24)    | Tree, Shrub, Herb, Vine | Narrow, Wide      |
| <i>P. torquatus</i>  | <i>Esenbeckia leiocarpa</i> , <i>Esenbeckia febrifuga</i> , <i>Citrus limon</i> , <i>Citrus sinensis</i> , <i>Euxylophora paraensis</i> (24)                                                                                                                                                                                                                                                                                                                                                                                                                                                                                                                                                                                                                                                                                                               | Bird dropping mimic (7, 24) | Tree, Shrub             | Wide              |
| <i>P. troilus</i>    | <i>Sassafras albidum</i> , <i>Lindera benzoin</i> , <i>Cinnamomum camphora</i> , <i>Persea borbonia</i> , <i>Liriodendron tulipifera</i> , <i>Magnolia virginiana</i> (18)                                                                                                                                                                                                                                                                                                                                                                                                                                                                                                                                                                                                                                                                                 | Startle response (1, 11)    | Tree, Shrub             | Wide              |

| Species                    | Host plants                                                                                                                                                                                                                                                                                                                                                                                                                                                                                                                                                                                                                                                                                                                                                                                                                                                                                                                                                                                                                                                                                                                                                                                                                                                                                              | Larval morphology         | Host growth form(s) | Host leaf size(s) |
|----------------------------|----------------------------------------------------------------------------------------------------------------------------------------------------------------------------------------------------------------------------------------------------------------------------------------------------------------------------------------------------------------------------------------------------------------------------------------------------------------------------------------------------------------------------------------------------------------------------------------------------------------------------------------------------------------------------------------------------------------------------------------------------------------------------------------------------------------------------------------------------------------------------------------------------------------------------------------------------------------------------------------------------------------------------------------------------------------------------------------------------------------------------------------------------------------------------------------------------------------------------------------------------------------------------------------------------------|---------------------------|---------------------|-------------------|
| <i>P. xuthus</i>           | <i>Zanthoxylum nitidum</i> , <i>Zanthoxylum piperitum</i> , <i>Zanthoxylum armatum</i> (planispinum), <i>Zanthoxylum beecheyanum</i> , <i>Zanthoxylum schinifolium</i> , <i>Zanthoxylum ailanthoides</i> , <i>Phellodendron amurense</i> , <i>Evodia glauca</i> , <i>Evodia rutaecarpa</i> , <i>Poncirus trifoliata</i> , <i>Skimmia japonica</i> , <i>Toddalia asiatica</i> , <i>Citrus natsudaikai</i> , <i>Citrus junos</i> , <i>Citrus unshiu</i> , <i>Citrus grandis</i> , <i>Citrus obovoidea</i> , <i>Citrus aurantium</i> , <i>Citrus tamurana</i> , <i>Citrus limon</i> , <i>Aegle sepiario</i> , <i>Citris nobilis</i> (11, 20)                                                                                                                                                                                                                                                                                                                                                                                                                                                                                                                                                                                                                                                                | Startle response (11, 24) | Tree, Shrub         | Wide              |
| <i>P. zelicaon</i>         | <i>Anethum graveolens</i> , <i>Angelica ampla</i> , <i>Angelica arguta</i> , <i>Angelica hendersonii</i> , <i>Angelica kingii</i> , <i>Angelica lineariloba</i> , <i>Angelica tomentosa</i> , <i>Angelica lucida</i> , <i>Apium graveolens</i> , <i>Cicuta maculata</i> , <i>Conioselinum scopulorum</i> , <i>Daucus carota</i> , <i>Daucus pusillus</i> , <i>Conium maculatum</i> , <i>Carum carvi</i> , <i>Foeniculum vulgare</i> , <i>Harbouria trachypleura</i> , <i>Heracleum lanatum</i> , <i>Heracleum sphondylium</i> , <i>Ligusticum porteri</i> , <i>Ligusticum grayi</i> , <i>Lomatium nuttallii</i> , <i>Lomatium californicum</i> , <i>Lomatium dasycarpum</i> , <i>Lomatium utriculatum</i> , <i>Lomatium parryi</i> , <i>Lomatium grayi</i> , <i>Lomatium triternatum</i> , <i>Lomatium marginatum</i> , <i>Lomatium dissectum</i> , <i>Oenanthe sarmentosa</i> , <i>Zizia aptera</i> , <i>Pseudocymopterus montanus</i> , <i>Pimpinella spp</i> , <i>Petroselinum crispum</i> , <i>Pteryxia hendersoni</i> , <i>Pteryxia petraea</i> , <i>Pteryxia terebinthina</i> , <i>Pastinaca sativa</i> , <i>Perideridia bolanderi</i> , <i>Perideridia gairdneri</i> , <i>Perideridia kelloggii</i> , <i>Sphenosciadium capitellatum</i> , <i>Tauschia arguta</i> , <i>Tauschia parishii</i> (18) | Aposematic (18)           | Herb                | Narrow, Wide      |
| <i>Eurytides marcellus</i> | <i>Oxandra lanceolata</i> , <i>Asimina triloba</i> , <i>Asimina grandiflora</i> (obovata), <i>Asimina pygmaea</i> , <i>Asimina incana</i> (speciosa), <i>Asimina angustifolia</i> (longifolia), <i>Asimina reticulata</i> , <i>Asimina parviflora</i> (24)                                                                                                                                                                                                                                                                                                                                                                                                                                                                                                                                                                                                                                                                                                                                                                                                                                                                                                                                                                                                                                               | Aposematic (24)           | Shrub               | Wide              |
| <i>Pachliopta neptunus</i> | <i>Thottea borneensis</i> (12)                                                                                                                                                                                                                                                                                                                                                                                                                                                                                                                                                                                                                                                                                                                                                                                                                                                                                                                                                                                                                                                                                                                                                                                                                                                                           | Aposematic (12)           | Shrub               | Wide              |

See text for category details and Table 4 for plant data references (host growth and leaf size).

1. Ae, S.A. (1979) *Systematic Entomology*. 4, 1-16.



2. Braby, M.F. (2000) *Butterflies of Australia: Their Identification, Biology, and Distribution* (CSIRO, Canberra).
3. Carpenter, G.D.H. (1916) *Proceedings of the Royal Entomological Society of London* **1915**, lxxxix-xcii.
4. Clarke, C. (1980) *Systematic Entomology* **5**, 49-57.
5. Clarke, C.A., Dickson, C.G.C. & Sheppard, P.M. (1963) *Evolution* **17**, 130-137.
6. Corbet, A.S. & Pendlebury, H.M. (1978) *The Butterflies of the Malay Peninsula. 3<sup>rd</sup> edition* (Kuala Lumpur, Malayan Nature Society).
7. DeVries, P.J. (1987) *The Butterflies of Costa Rica and Their Natural History, Vol. I: Papilionidae, Pieridae, Nymphalidae* (Princeton University Press, Princeton, NJ).
8. Dyar, H.G. (1911) *Proceedings of the Entomological Society of Washington* **13**, 227-232.
9. Goodman, A.B. & Goodman, O.R. (1927) *The Entomologist* **60**, 251-253.
10. Hancock, D.L. (1979) *Arnoldia Zimbabwe Rhodesia* **33**, 1-6.
11. Igarashi, S. (1979) *Papilionidae and their early stages* (Kodansha, Tokyo).
12. Igarashi, S. & Fukuda, H. (1997) *The Life Histories of Asian Butterflies Volume 1* (Tokai University Press, Tokyo).
13. Igarashi, S. & Fukuda, H. (2000) *The Life Histories of Asian Butterflies Volume 2* (Tokai University Press, Tokyo).
14. Joannou, J.G. (1992) *Metamorphosis* **3**, 89-94.
15. Marsh, J.C.S. (1960) *Hong Kong Butterflies* (Shell Co., Hong Kong).
16. Munroe, E. (1961) *Canadian Entomologist* **S17**, 1-51.
17. Ross, G.N. (1964) *Journal of Research on the Lepidoptera* **3**, 9-18.
18. Scott, J.A. 1986. *The Butterflies of North America* (Stanford University Press, Stanford, CA).
19. Sperling, F.A. & Feeny P.P. (1995) in *Swallowtail Butterflies: Their Ecology and Evolutionary Biology*, eds Scriber JM, Tsubaki Y, Lederhouse RC (Scientific Press, Gainesville, FL, USA), pp 299-306.
20. Talbot, G. (1978) *The Fauna of British India, Including Ceylon and Burma – Butterflies, Volume I.* (Today and Tomorrow's Printers and Publishers, New Delhi).
21. Tolman, T. (1997) *Butterflies of Britain and Europe* (Harper Collins, London).

22. Tsukada, E. & Nishiyama, Y. (1980) *Butterflies of the South East Asian Islands, Volume I Papilionidae* (Plapac Co. Ltd, Tokyo).
23. Tuzov, V.K., Bogdanov, P.V., Devyatkin, A.L., Kaabak, L.V., Korolev, V.A., Murzin, V.S., Samodurov, G.D., & Tarasov, E.A. (1997) *Guide to the Butterflies of Russia and Adjacent Territories (Lepidoptera, Rhopalocera)* (Pensoft, Moscow).
24. Tyler, H.A., Brown Jr., K.S., & Wilson, K.H. (1994) *Swallowtail butterflies of the Americas: A study in biological dynamics, ecological diversity, biosystematics and conservation* (Scientific Publishers, Inc., Gainesville, FL).
25. van Someren, V.G.L. (1974) *J. Lepidopterists' Soc.* **28**, 315-331.
26. van Son, G. (1949) *The Butterflies of Southern Africa* (Pretoria, South Africa).
27. Williams, J.G. (1971) *A field guide to the butterflies of Africa* (Houghton Mifflin, Boston, MA).
28. Zhang, L.J. (1983) *Entomological Knowledge* **20**, 28-29.
