# Supplementary material
Source: PubMed Central journal article supplement (PMC2148298)
Supplement: pnas_0705478104_2.pdf [file pnas_0705478104_2.pdf]

**Table 4. Host plant species data**

| Family        | Species                          | Growth form           | Leaf size    | Secondary chemical compounds   | Relevant Papilionidae species                                 |
|---------------|----------------------------------|-----------------------|--------------|--------------------------------|---------------------------------------------------------------|
| Aceraceae     | <i>Acer spp.</i>                 | Tree, Shrub (261)     | Wide (261)   | Phenolic (147)                 | <i>P. canadensis</i> , <i>P. rutulus</i>                      |
| Anacardiaceae | <i>Pseudospondias microcarpa</i> | Tree (271)            | Wide (189)   |                                | <i>P. demodocus</i> Kenya                                     |
|               | <i>Rhus hypoleuca</i>            | Tree (144)            | Wide (106)   | Coumarin (286)                 | <i>P. bicolor</i>                                             |
| Annonaceae    | <i>Asimina angustifolia</i>      | Shrub (261)           | Wide (261)   |                                | <i>Eurytides marcellus</i>                                    |
|               | <i>Asimina incana</i>            | Shrub (261)           | Wide (261)   |                                | <i>Eurytides marcellus</i>                                    |
|               | <i>Asimina obovata</i>           | Tree, Shrub (261)     | Wide (261)   |                                | <i>Eurytides marcellus</i>                                    |
|               | <i>Asimina parviflora</i>        | Tree, Shrub (261)     | Wide (278)   | Alkaloid, Amide (153)          | <i>Eurytides marcellus</i>                                    |
|               | <i>Asimina pygmaea</i>           | Shrub, Subshrub (261) | Wide (278)   | Alkaloid, Amide (153)          | <i>Eurytides marcellus</i>                                    |
|               | <i>Asimina reticulata</i>        | Shrub (261)           | Wide (278)   | Alkaloid, Amide (153)          | <i>Eurytides marcellus</i>                                    |
|               | <i>Asimina triloba</i>           | Tree, Shrub (261)     | Wide (278)   | Alkaloid, Amide (153)          | <i>Eurytides marcellus</i>                                    |
|               | <i>Oxandra lanceolata</i>        | Tree (261)            | Wide (70)    | Alkaloid, Terpenoid (250, 287) | <i>Eurytides marcellus</i>                                    |
| Aptiaceae     | <i>Aegopodium podagraria</i>     | Herb, perennial (261) | Wide (261)   | Coumarin (185)                 | <i>P. machaon</i>                                             |
|               | <i>Aletes acaulis</i>            | Herb, perennial (261) | Narrow (261) |                                | <i>P. indra</i>                                               |
|               | <i>Ammi visnaga</i>              | Herb, biennial (261)  | Narrow (261) | Coumarin (165)                 | <i>P. machaon</i>                                             |
|               | <i>Anethum graveolens</i>        | Herb, annual (261)    | Narrow (261) | Coumarin (185)                 | <i>P. machaon</i> , <i>P. polyxenes</i> , <i>P. zeliccaon</i> |
|               | <i>Angelica ampla</i>            | Herb, perennial (261) | Narrow (261) | Coumarin (168)                 | <i>P. polyxenes</i> , <i>P. zeliccaon</i>                     |
|               | <i>Angelica archangelica</i>     | Herb, perennial (258) | Wide (8)     | Coumarin (185)                 | <i>P. machaon</i> , <i>P. m. hippocrates</i>                  |
|               | <i>Angelica arguta</i>           | Herb, perennial (261) | Wide (261)   | Coumarin (168)                 | <i>P. zeliccaon</i>                                           |
|               | <i>Angelica atropurpurea</i>     | Herb, perennial (261) | Wide (261)   | Coumarin (24)                  | <i>P. polyxenes</i>                                           |
|               | <i>Angelica hendersonii</i>      | Herb, perennial (261) | Wide (261)   | Coumarin (272)                 | <i>P. zeliccaon</i>                                           |
|               | <i>Angelica kingii</i>           | Herb, perennial (261) | Wide (261)   | Coumarin (168)                 | <i>P. zeliccaon</i>                                           |
|               | <i>Angelica lineariloba</i>      | Herb, perennial (261) | Narrow (261) | Coumarin (168)                 | <i>P. zeliccaon</i>                                           |
|               | <i>Angelica lucida</i>           | Herb, perennial (261) | Wide (261)   | Coumarin (168)                 | <i>P. zeliccaon</i>                                           |
|               | <i>Angelica sylvestris</i>       | Herb, perennial (261) | Wide (8)     | Coumarin (168)                 | <i>P. machaon</i>                                             |

| Family   | Species                         | Growth form                    | Leaf size    | Secondary chemical compounds | Relevant Papilionidae species                                   |
|----------|---------------------------------|--------------------------------|--------------|------------------------------|-----------------------------------------------------------------|
|          | <i>Angelica tomentosa</i>       | Herb, perennial (261)          | Wide (261)   | Coumarin (168)               | <i>P. zelicaon</i>                                              |
|          | <i>Angelica venenosa</i>        | Herb, perennial (261)          | Narrow (261) | Coumarin (168)               | <i>P. polyxenes</i>                                             |
|          | <i>Apium graveolens</i>         | Herb, perennial (261)          | Narrow (8)   | Coumarin (157)               | <i>P. polyxenes, P. zelicaon</i>                                |
|          | <i>Berula erecta</i>            | Herb, perennial (261)          | Wide (8)     |                              | <i>P. polyxenes</i>                                             |
| Apiaceae | <i>Bupleurum falcatum</i>       | Herb, perennial (258)          | Narrow (8)   | Coumarin (198)               | <i>P. machaon</i>                                               |
|          | <i>Bupleurum fruticosum</i>     | Shrub (258)                    | Narrow (8)   |                              | <i>P. machaon</i>                                               |
|          | <i>Carum carvi</i>              | Herb, biennial/perennial (261) | Narrow (8)   | Coumarin (17)                | <i>P. machaon, P. polyxenes, P. zelicaon</i>                    |
|          | <i>Cicuta bulbifera</i>         | Herb, perennial (261)          | Narrow (261) | Coumarin (24)                | <i>P. polyxenes</i>                                             |
|          | <i>Cicuta douglasii</i>         | Herb, perennial (261)          | Wide (261)   | Coumarin (176)               | <i>P. polyxenes</i>                                             |
|          | <i>Cicuta maculata</i>          | Herb, biennial/perennial (261) | Narrow (261) | Coumarin (24)                | <i>P. polyxenes, P. zelicaon</i>                                |
|          | <i>Contoselinum scopulorum</i>  | Herb, perennial (261)          | Narrow (261) |                              | <i>P. zelicaon</i>                                              |
|          | <i>Conium maculatum</i>         | Herb, biennial (261)           | Narrow (261) | Coumarin (24)                | <i>P. polyxenes, P. zelicaon</i>                                |
|          | <i>Critinum maritimum</i>       | Shrub, herb (258)              | Narrow (8)   | Coumarin, Terpenoid (37)     | <i>P. machaon</i>                                               |
|          | <i>Cryptotaenia canadensis</i>  | Herb, perennial (261)          | Wide (261)   | Terpenoid (219)              | <i>P. polyxenes</i>                                             |
|          | <i>Cymopterus panamintensis</i> | Herb, perennial (261)          | Wide (261)   | Coumarin (282)               | <i>P. indra, P. polyxenes</i>                                   |
|          | <i>Cymopterus purpureus</i>     | Herb, perennial (261)          | Narrow (261) |                              | <i>P. indra</i>                                                 |
|          | <i>Daucus carota</i>            | Herb, biennial (261)           | Narrow (261) | Coumarin, Terpenoid (34)     | <i>P. machaon, P. m. hippocrates, P. polyxenes, P. zelicaon</i> |
|          | <i>Daucus pusillus</i>          | Herb, annual (261)             | Narrow (40)  | Coumarin, Terpenoid (34)     | <i>P. polyxenes, P. zelicaon</i>                                |
|          | <i>Falcaria vulgaris</i>        | Herb, perennial (261)          | Narrow (8)   | Coumarin, Phenolic (77, 289) | <i>P. alexanor, P. machaon</i>                                  |
|          | <i>Ferula communis</i>          | Shrub, herb (258)              | Narrow (8)   | Coumarin (291)               | <i>P. alexanor, P. hospiton, P. machaon</i>                     |
|          | <i>Ferula karategina</i>        | Herb (229)                     | Narrow (8)   | Coumarin (291)               | <i>P. alexanor</i>                                              |
|          | <i>Ferula ugamica</i>           | Shrub, herb (229)              | Narrow (8)   | Coumarin (291)               | <i>P. alexanor</i>                                              |

| Family   | Species                       | Growth form                    | Leaf size    | Secondary chemical compounds   | Relevant Papilionidae species                                                                                             |
|----------|-------------------------------|--------------------------------|--------------|--------------------------------|---------------------------------------------------------------------------------------------------------------------------|
|          | <i>Foeniculum vulgare</i>     | Herb, biennial/perennial (261) | Narrow (261) | Coumarin (2)                   | <i>P. demodocus</i> South Africa, <i>P. machaon</i> , <i>P. m. hippocrates</i> , <i>P. polyxenes</i> , <i>P. zelicaon</i> |
|          | <i>Harbouria trachypleura</i> | Herb, perennial (261)          | Narrow (261) | Coumarin (95)                  | <i>P. indra</i> , <i>P. polyxenes</i> , <i>P. zelicaon</i>                                                                |
|          | <i>Heracleum lanatum</i>      | Herb, perennial (261)          | Wide (261)   | Coumarin (24)                  | <i>P. machaon hippocrates</i> <i>P. m. oregonius</i> , <i>P. polyxenes</i> , <i>P. zelicaon</i>                           |
| Apiaceae | <i>Heracleum sphondylium</i>  | Herb, perennial (261)          | Wide (261)   | Coumarin (24)                  | <i>P. machaon</i> , <i>P. zelicaon</i>                                                                                    |
|          | <i>Laserpitium halleri</i>    | Herb, perennial (258)          | Narrow (8)   | Terpenoid (10)                 | <i>P. machaon</i>                                                                                                         |
|          | <i>Laserpitium latifolium</i> | Herb, perennial (258)          | Wide (8)     | Phenolic, Terpenoid (161, 264) | <i>P. machaon</i>                                                                                                         |
|          | <i>Levisticum officinale</i>  | Herb, perennial (261)          | Wide (8)     | Coumarin (185)                 | <i>P. machaon</i> , <i>P. polyxenes</i>                                                                                   |
|          | <i>Ligusticum grayi</i>       | Herb, perennial (261)          | Wide (261)   | Coumarin (202)                 | <i>P. zelicaon</i>                                                                                                        |
|          | <i>Ligusticum porteri</i>     | Herb, perennial (261)          | Narrow (261) | Coumarin (202)                 | <i>P. zelicaon</i>                                                                                                        |
|          | <i>Ligusticum scoticum</i>    | Herb, perennial (261)          | Wide (261)   |                                | <i>P. polyxenes</i>                                                                                                       |
|          | <i>Lomatium californicum</i>  | Herb, perennial (261)          | Narrow (261) | Coumarin (263)                 | <i>P. zelicaon</i>                                                                                                        |
|          | <i>Lomatium dasycarpum</i>    | Herb, perennial (261)          | Narrow (40)  | Coumarin (263)                 | <i>P. zelicaon</i>                                                                                                        |
|          | <i>Lomatium dissectum</i>     | Herb, perennial (261)          | Narrow (261) | Coumarin (263)                 | <i>P. indra</i> , <i>P. zelicaon</i>                                                                                      |
|          | <i>Lomatium eastwoodii</i>    | Herb, perennial (261)          | Narrow (261) | Coumarin (263)                 | <i>P. indra</i>                                                                                                           |
|          | <i>Lomatium grayi</i>         | Herb, perennial (261)          | Narrow (261) | Coumarin (263)                 | <i>P. indra</i> , <i>P. zelicaon</i>                                                                                      |
|          | <i>Lomatium junceum</i>       | Herb, perennial (261)          | Narrow (261) | Coumarin (263)                 | <i>P. indra</i>                                                                                                           |
|          | <i>Lomatium latilobum</i>     | Herb, perennial (261)          | Narrow (261) | Coumarin (263)                 | <i>P. indra</i>                                                                                                           |
|          | <i>Lomatium lucidum</i>       | Herb, perennial (261)          | Wide (40)    | Coumarin (263)                 | <i>P. indra</i>                                                                                                           |
|          | <i>Lomatium marginatum</i>    | Herb, perennial (261)          | Narrow (261) | Coumarin (263)                 | <i>P. indra</i> , <i>P. zelicaon</i>                                                                                      |
|          | <i>Lomatium nuttallii</i>     | Herb, perennial (261)          | Narrow (261) | Coumarin (141)                 | <i>P. indra</i> , <i>P. zelicaon</i>                                                                                      |
|          | <i>Lomatium parryi</i>        | Herb, perennial (261)          | Narrow (261) | Coumarin (263)                 | <i>P. indra</i> , <i>P. zelicaon</i>                                                                                      |
|          | <i>Lomatium scabrum</i>       | Herb, perennial (261)          | Narrow (261) | Coumarin (263)                 | <i>P. indra</i>                                                                                                           |

| Family   | Species                          | Growth form                    | Leaf size    | Secondary chemical compounds | Relevant Papilionidae species                                                                       |
|----------|----------------------------------|--------------------------------|--------------|------------------------------|-----------------------------------------------------------------------------------------------------|
|          | <i>Lomatium triternatum</i>      | Herb, perennial (261)          | Narrow (261) | Coumarin (263)               | <i>P.indra</i> , <i>P.zelicaon</i>                                                                  |
|          | <i>Lomatium utriculatum</i>      | Herb, perennial (261)          | Narrow (261) | Coumarin (263)               | <i>P.zelicaon</i>                                                                                   |
|          | <i>Meum athamanticum</i>         | Herb, perennial (258)          | Narrow (8)   | Terpenoid (191)              | <i>P.machaon</i>                                                                                    |
|          | <i>Oenanthe sarmentosa</i>       | Herb, perennial (261)          | Wide (40)    | Coumarin (244)               | <i>P.zelicaon</i>                                                                                   |
|          | <i>Opopanax chironium</i>        | Herb, perennial (258)          | Narrow (8)   | Coumarin (11)                | <i>P.alexanor</i>                                                                                   |
|          | <i>Opopanax hispidus</i>         | Herb, perennial (258)          | Narrow (94)  | Coumarin (11)                | <i>P.alexanor</i>                                                                                   |
|          | <i>Osmorhiza longistylis</i>     | Herb, perennial (261)          | Wide (261)   | Coumarin (107)               | <i>P.polyxenes</i>                                                                                  |
|          | <i>Oxyopolis cambyi</i>          | Herb, perennial (261)          | Narrow (208) |                              | <i>P.polyxenes</i>                                                                                  |
|          | <i>Pastinaca sativa</i>          | Herb, biennial/perennial (261) | Wide (8)     | Coumarin (24)                | <i>P.alexanor</i> , <i>P.machaon</i><br><i>hippocrates</i> , <i>P.polyxenes</i> , <i>P.zelicaon</i> |
|          | <i>Perideridia bolanderi</i>     | Herb, perennial (261)          | Narrow (261) | Flavonoid (83)               | <i>P.zelicaon</i>                                                                                   |
| Apiaceae | <i>Perideridia gairdneri</i>     | Herb, perennial (261)          | Narrow (188) | Flavonoid (83)               | <i>P.zelicaon</i>                                                                                   |
|          | <i>Perideridia kelloggii</i>     | Herb, perennial (261)          | Narrow (59)  | Flavonoid (83)               | <i>P.zelicaon</i>                                                                                   |
|          | <i>Petroselinum crispum</i>      | Herb, annual/biennial (261)    | Narrow (261) | Coumarin (185)               | <i>P.machaon</i> , <i>P.polyxenes</i> , <i>P.zelicaon</i>                                           |
|          | <i>Peucedanum cervaria</i>       | Herb, perennial (258)          | Narrow (8)   | Coumarin (19)                | <i>P.machaon</i>                                                                                    |
|          | <i>Peucedanum officinale</i>     | Herb, perennial (258)          | Narrow (261) | Coumarin (86)                | <i>P.machaon</i>                                                                                    |
|          | <i>Peucedanum oreoselinum</i>    | Herb, perennial (258)          | Narrow (8)   | Coumarin (96)                | <i>P.machaon</i>                                                                                    |
|          | <i>Peucedanum palustre</i>       | Herb, perennial (261)          | Narrow (8)   | Coumarin (185)               | <i>P.machaon</i>                                                                                    |
|          | <i>Peucedanum paniculatum</i>    | Herb, perennial (258)          | Narrow (8)   | Coumarin (110)               | <i>P.hospiton</i>                                                                                   |
|          | <i>Pimpinella saxifraga</i>      | Herb, perennial (261)          | Narrow (8)   | Coumarin (76)                | <i>P.alexanor</i> , <i>P.machaon</i>                                                                |
|          | <i>Pseudocymopterus montanus</i> | Herb, perennial (261)          | Narrow (261) |                              | <i>P.zelicaon</i>                                                                                   |
|          | <i>Pteryxia hendersonii</i>      | Herb, perennial (261)          | Narrow (261) | Coumarin (249)               | <i>P.indra</i> , <i>P.zelicaon</i>                                                                  |
|          | <i>Pteryxia petraea</i>          | Herb, perennial (261)          | Narrow (261) | Coumarin (249)               | <i>P.indra</i> , <i>P.zelicaon</i>                                                                  |
|          | <i>Pteryxia terebinthina</i>     | Herb, perennial (261)          | Narrow (261) | Coumarin (249)               | <i>P.indra</i> , <i>P.zelicaon</i>                                                                  |
|          | <i>Ptilimnium capillaceum</i>    | Herb, annual (261)             | Narrow (261) |                              | <i>P.polyxenes</i>                                                                                  |

| Family           | Species                                   | Growth form                    | Leaf size    | Secondary chemical compounds | Relevant Papilionidae species                          |
|------------------|-------------------------------------------|--------------------------------|--------------|------------------------------|--------------------------------------------------------|
|                  | <i>Pychothis saxifraga (heterophylla)</i> | Herb, biennial (258)           | Narrow (94)  | Terpenoid (167)              | <i>P. alexanor</i>                                     |
|                  | <i>Ridolfia segetum</i>                   | Herb, annual (258)             | Narrow (260) | Terpenoid (190)              | <i>P. machaon</i>                                      |
|                  | <i>Scaligeria cretica</i>                 | Herb, biennial (258)           | Narrow (260) |                              | <i>P. alexanor</i>                                     |
|                  | <i>Selinum carvifolia</i>                 | Herb, perennial (261)          | Narrow (235) |                              | <i>P. machaon</i>                                      |
|                  | <i>Seseli dioicum</i>                     | Herb, perennial (258)          | Narrow (8)   | Coumarin, Terpenoid (253)    | <i>P. alexanor</i>                                     |
|                  | <i>Seseli libanotis</i>                   | Herb, biennial (261)           | Narrow (8)   | Coumarin (143)               | <i>P. alexanor, P. machaon</i>                         |
|                  | <i>Seseli montanum</i>                    | Herb, perennial (258)          | Narrow (8)   | Coumarin (142)               | <i>P. alexanor</i>                                     |
|                  | <i>Seseli varium</i>                      | Herb, biennial/perennial (258) | Narrow (8)   | Coumarin (216)               | <i>P. machaon</i>                                      |
|                  | <i>Silaum silaus</i>                      | Herb, perennial (258)          | Narrow (235) | Terpenoid (28)               | <i>P. machaon</i>                                      |
|                  | <i>Sium suave</i>                         | Herb, perennial (261)          | Wide (278)   | Coumarin (24)                | <i>P. polyxenes</i>                                    |
|                  | <i>Spermolepis divaricata</i>             | Herb, annual (261)             | Narrow (261) |                              | <i>P. polyxenes</i>                                    |
|                  | <i>Sphenosciadium capitellatum</i>        | Herb, perennial (261)          | Wide (261)   | Coumarin (141)               | <i>P. zelicaon</i>                                     |
|                  | <i>Taenidia integerrima</i>               | Herb, perennial (261)          | Wide (261)   |                              | <i>P. polyxenes</i>                                    |
| Apiaceae         | <i>Tauschia arguta</i>                    | Herb, perennial (261)          | Wide (40)    |                              | <i>P. indra, P. polyxenes, P. zelicaon</i>             |
|                  | <i>Tauschia parishii</i>                  | Herb, perennial (261)          | Narrow (40)  |                              | <i>P. indra, P. polyxenes, P. zelicaon</i>             |
|                  | <i>Thaspium barbinode</i>                 | Herb, perennial (261)          | Wide (261)   |                              | <i>P. polyxenes</i>                                    |
|                  | <i>Torilis heterophylla</i>               | Herb, annual (261)             | Narrow (261) |                              | <i>P. alexanor</i>                                     |
|                  | <i>Trinita glauca</i>                     | Herb, perennial (258)          | Wide (235)   | Phenolic (22)                | <i>P. machaon</i>                                      |
|                  | <i>Zizia aptera</i>                       | Herb, perennial (261)          | Wide (261)   | Coumarin (221)               | <i>P. machaon oregonius, P. polyxenes, P. zelicaon</i> |
|                  | <i>Zizia aurea</i>                        | Herb, perennial (261)          | Wide (261)   | Coumarin (221)               | <i>P. polyxenes</i>                                    |
| Araceae          | <i>Syngonium podophyllum</i>              | Vine, perennial (261)          | Wide (278)   |                              | <i>P. scamander, P. ithoas</i>                         |
| Aristolochiaceae | <i>Thottea bomeensis</i>                  | Shrub (109)                    | Wide (288)   | Aristolochic acid (180)      | <i>Pachilopta neptunus</i>                             |
| Asteraceae       | <i>Artemisia dracunculus</i>              | Shrub, subshrub, herb (261)    | Narrow (261) | Phenolic (186)               | <i>P. machaon oregonius</i>                            |
|                  | <i>Artemisia norvegica</i>                | Shrub, subshrub (261)          | Narrow (261) | Phenolic (186)               | <i>P. machaon oregonius</i>                            |

| Family     | Species                      | Growth form            | Leaf size    | Secondary chemical compounds | Relevant Papilionidae species                |
|------------|------------------------------|------------------------|--------------|------------------------------|----------------------------------------------|
| Betulaceae | <i>Alnus crispa</i>          | Tree, Shrub (261)      | Wide (261)   | Phenolic (51)                | <i>P. rutulus</i>                            |
|            | <i>Alnus incana</i>          | Tree, Shrub (261)      | Wide (8)     | Phenolic (111)               | <i>P. glaucus</i>                            |
|            | <i>Alnus rubra</i>           | Tree (261)             | Wide (261)   | Phenolic (87)                | <i>P. rutulus</i>                            |
|            | <i>Alnus rugosa</i>          | Tree, Shrub (261)      | Wide (261)   | Phenolic (248)               | <i>P. canadensis</i>                         |
|            | <i>Alnus tenuifolia</i>      | Tree, Shrub (261)      | Wide (261)   | Phenolic (248)               | <i>P. rutulus</i>                            |
|            | <i>Alnus viridis</i>         | Tree, Shrub (261)      | Wide (261)   | Phenolic (248)               | <i>P. rutulus</i>                            |
|            | <i>Betula alleghaniensis</i> | Tree (261)             | Wide (261)   | Phenolic (21)                | <i>P. canadensis</i>                         |
|            | <i>Betula lenta</i>          | Tree (261)             | Wide (74)    | Phenolic (227)               | <i>P. canadensis</i>                         |
|            | <i>Betula papyrifera</i>     | Tree (261)             | Wide (74)    | Phenolic (227)               | <i>P. canadensis, P. rutulus</i>             |
|            | <i>Betula pendula</i>        | Tree (261)             | Wide (74)    |                              | <i>P. canadensis</i>                         |
| Ericaceae  | <i>Carpinus caroliniana</i>  | Tree, Shrub (261)      | Wide (74)    | Phenolic (209)               | <i>P. glaucus</i>                            |
|            | <i>Corylus spp.</i>          | Tree, Shrub (261)      | Wide (74)    | Phenolic (7)                 | <i>P. canadensis</i>                         |
|            | <i>Catalpa bignonioides</i>  | Tree (261)             | Wide (278)   | Iridoid (151)                | <i>P. glaucus</i>                            |
|            | <i>Warburgia ugandensis</i>  | Tree (55)              | Wide (27)    | Flavonoid (152)              | <i>P. nobilis</i>                            |
|            | <i>Vaccinium smallii</i>     | Shrub, small (184)     | Wide (79)    | Flavonoid (49)               | <i>P. machaon hippocrates</i>                |
|            | <i>Cullen australasicum</i>  | Herb, perennial (20)   | Narrow (174) | Coumarin (31)                | <i>P. demoleus sthenelus</i>                 |
|            | <i>Cullen badocanum</i>      | Shrub, subshrub (20)   | Narrow (89)  | Coumarin (31)                | <i>P. demoleus sthenelus</i>                 |
|            | <i>Cullen balsamicum</i>     | Shrub, small Tree (89) | Narrow (89)  | Coumarin (31)                | <i>P. demoleus sthenelus</i>                 |
|            | <i>Cullen cinereum</i>       | Herb, perennial (20)   | Wide (174)   | Coumarin (31)                | <i>P. demoleus sthenelus</i>                 |
|            | <i>Cullen patens</i>         | Herb, perennial (20)   | Narrow (174) | Coumarin (31)                | <i>P. demoleus sthenelus</i>                 |
| Fabaceae   | <i>Cullen pustulatum</i>     | Subshrub (20)          | Narrow (89)  | Coumarin (113)               | <i>P. demoleus sthenelus</i>                 |
|            | <i>Cullen tenax</i>          | Herb, perennial (20)   | Narrow (174) | Coumarin (31)                | <i>P. demoleus sthenelus</i>                 |
|            | <i>Hernandia didymantha</i>  | Tree (45)              | Wide (70)    | Alkaloid (279)               | <i>P. birchalli</i>                          |
|            | <i>Carya spp.</i>            | Tree (261)             | Wide (288)   | Flavonoid (53)               | <i>P. canadensis, P. glaucus, P. rutulus</i> |
|            | <i>Cinnamomum camphora</i>   | Tree (109)             | Wide (278)   | Coumarin (228)               | <i>P. epycides, P. glaucus, P. troilus</i>   |

| Family       | Species                           | Growth form       | Leaf size  | Secondary chemical compounds   | Relevant Papilionidae species               |
|--------------|-----------------------------------|-------------------|------------|--------------------------------|---------------------------------------------|
|              | <i>Cinnamomum iners</i>           | Tree (109)        |            | Coumarin (228)                 | <i>P. clytia</i>                            |
|              | <i>Cryptocarya aschersontiana</i> | Tree (163)        | Wide (70)  | Terpenoid (175)                | <i>P. scamander</i>                         |
|              | <i>Lindera benzoin</i>            | Tree, Shrub (261) | Wide (278) | Alkaloid (18)                  | <i>P. glaucus, P. troilus</i>               |
|              | <i>Litsea glaucescens</i>         | Tree, Shrub (256) | Wide (70)  | Flavonoid (148)                | <i>P. pilumnus</i>                          |
|              | <i>Litsea glutinosa</i>           | Tree, small (109) |            | Alkaloid (101)                 | <i>P. clytia</i>                            |
|              | <i>Litsea sebifera</i>            | Tree, bushy (210) | Wide (210) | Alkaloid (232)                 | <i>P. clytia</i>                            |
|              | <i>Nectandra spp.</i>             | Tree, Shrub (261) | Wide (70)  | Alkaloid (164)                 | <i>P. scamander</i>                         |
|              | <i>Ocotea pretiosa</i>            | Tree (70)         | Wide (70)  | Terpenoid (104)                | <i>P. scamander</i>                         |
|              | <i>Persea americana</i>           | Tree (261)        | Wide (70)  | Phenolic (200)                 | <i>P. garamas, P. rutulus, P. scamander</i> |
|              | <i>Persea borbonia</i>            | Tree, Shrub (261) | Wide (278) | Terpenoid (257)                | <i>P. palamedes, P. troilus</i>             |
|              | <i>Persea rigida</i>              | Tree, Shrub (135) | Wide (135) | Terpenoid (257)                | <i>P. scamander</i>                         |
|              | <i>Persea rufescens</i>           | Tree (149)        | Wide (149) | Terpenoid (257)                | <i>P. garamas, P. scamander</i>             |
|              | <i>Sassafras albidum</i>          | Tree, Shrub (261) | Wide (278) | Flavanoid, Terpenoid (203)     | <i>P. glaucus, P. palamedes, P. troilus</i> |
| Magnoliaceae | <i>Liriodendron tulipifera</i>    | Tree (261)        | Wide (278) | Alkaloid (290)                 | <i>P. glaucus, P. troilus</i>               |
|              | <i>Magnolia acuminata</i>         | Tree (261)        | Wide (278) | Alkaloid (130)                 | <i>P. glaucus</i>                           |
|              | <i>Magnolia dealbata</i>          | Tree (261)        | Wide (261) | Coumarin, Terpenoid (280)      | <i>P. esperanza, P. garamas</i>             |
|              | <i>Magnolia virginiana</i>        | Tree, Shrub (261) | Wide (278) | Coumarin, Terpenoid (280, 181) | <i>P. glaucus, P. troilus</i>               |
|              | <i>Talauma ovata</i>              | Tree (207)        | Wide (70)  | Neolignan (236)                | <i>P. scamander</i>                         |
| Oleaceae     | <i>Fraxinus americana</i>         | Tree (261)        | Wide (278) | Iridoid (245)                  | <i>P. canadensis, P. glaucus</i>            |
|              | <i>Fraxinus anomala</i>           | Tree, Shrub (261) | Wide (261) | Iridoid (245)                  | <i>P. multicaudatus</i>                     |
|              | <i>Fraxinus caroliniana</i>       | Tree, Shrub (261) | Wide (278) | Iridoid (245)                  | <i>P. glaucus</i>                           |
|              | <i>Fraxinus latifolia</i>         | Tree (261)        | Wide (261) | Iridoid (245)                  | <i>P. multicaudatus</i>                     |
|              | <i>Fraxinus nigra</i>             | Tree (261)        | Wide (261) | Iridoid (245)                  | <i>P. glaucus</i>                           |
|              | <i>Fraxinus oregonius</i>         | Tree (261)        | Wide (261) | Iridoid (245)                  | <i>P. multicaudatus</i>                     |

| Family      | Species                       | Growth form                 | Leaf size  | Secondary chemical compounds | Relevant Papilionidae species                                      |
|-------------|-------------------------------|-----------------------------|------------|------------------------------|--------------------------------------------------------------------|
|             | <i>Fraxinus pennsylvanica</i> | Tree (261)                  | Wide (278) | Iridoid (245)                | <i>P. canadensis</i> , <i>P. glaucus</i> , <i>P. multicaudatus</i> |
|             | <i>Fraxinus viridis</i>       | Tree (261)                  | Wide (261) |                              | <i>P. multicaudatus</i>                                            |
|             | <i>Ligustrum lucidum</i>      | Tree, Shrub (261)           | Wide (278) | Alkaloid (215)               | <i>P. multicaudatus</i>                                            |
|             | <i>Ligustrum vulgare</i>      | Shrub (261)                 | Wide (235) | Iridoid, Phenolic (213)      | <i>P. multicaudatus</i>                                            |
|             | <i>Syringa vulgaris</i>       | Shrub (261)                 | Wide (235) | Alkaloid, Coumarin (136)     | <i>P. canadensis</i> , <i>P. glaucus</i> , <i>P. rutulus</i>       |
| Piperaceae  | <i>Piper aduncum</i>          | Tree, Shrub (261)           | Wide (70)  | Alkaloid, Phenolic (193)     | <i>P. thoas</i>                                                    |
|             | <i>Piper amalago</i>          | Tree, Shrub (261)           | Wide (70)  | Alkaloid (121)               | <i>P. hectorides</i> , <i>P. thoas</i>                             |
|             | <i>Piper auritum</i>          | Tree (261)                  | Wide (70)  | Alkaloid, Phenolic (97)      | <i>P. thoas</i>                                                    |
|             | <i>Piper karberi</i>          | Tree (70)                   | Wide (70)  | Alkaloid (121)               | <i>P. thoas</i>                                                    |
|             | <i>Piper marginatum</i>       | Tree, Shrub (261)           | Wide (70)  | Alkaloid (218)               | <i>P. thoas</i>                                                    |
|             | <i>Piper multiplinervium</i>  | Shrub (45)                  | Wide (70)  | Alkaloid (121)               | <i>P. thoas</i>                                                    |
|             | <i>Piper reticulatum</i>      | Tree, Shrub (207)           | Wide (70)  | Alkaloid (154)               | <i>P. thoas</i>                                                    |
|             | <i>Piper sancti-felices</i>   | Shrub (207)                 | Wide (70)  | Alkaloid (121)               | <i>P. thoas</i>                                                    |
|             | <i>Piper tuberculatum</i>     | Tree, Shrub (261)           | Wide (70)  | Alkaloid (56)                | <i>P. thoas</i>                                                    |
|             | <i>Piper xylosteoides</i>     | Tree, Shrub (70)            | Wide (70)  | Alkaloid (121)               | <i>P. hectorides</i> , <i>P. thoas</i>                             |
|             | <i>Pothomorphe peltata</i>    | Shrub, Subshrub, Herb (261) | Wide (70)  | Phenolic (162)               | <i>P. thoas</i>                                                    |
| Platanaceae | <i>Platanus racemosa</i>      | Tree (261)                  | Wide (40)  | Coumarin, Phenolic (159)     | <i>P. multicaudatus</i> , <i>P. rutulus</i>                        |
| Populaceae  | <i>Populus angustifolia</i>   | Tree (261)                  | Wide (261) | Phenolic (204)               | <i>P. rutulus</i>                                                  |
|             | <i>Populus balsamifera</i>    | Tree (261)                  | Wide (278) | Phenolic (194)               | <i>P. canadensis</i> , <i>P. rutulus</i>                           |
|             | <i>Populus deltoides</i>      | Tree (261)                  | Wide (278) | Phenolic (146)               | <i>P. glaucus</i>                                                  |
|             | <i>Populus grandidentata</i>  | Tree (261)                  | Wide (261) | Phenolic (68)                | <i>P. canadensis</i>                                               |
|             | <i>Populus tremuloides</i>    | Tree (261)                  | Wide (261) | Phenolic (52)                | <i>P. canadensis</i> , <i>P. glaucus</i> , <i>P. rutulus</i>       |
|             | <i>Populus trichocarpa</i>    | Tree (261)                  | Wide (261) | Phenolic (194)               | <i>P. rutulus</i>                                                  |
| Rosaceae    | <i>Amelanchier canadensis</i> | Tree, Shrub (261)           | Wide (261) | Phenolic (222)               | <i>P. canadensis</i>                                               |



| Family   | Species                        | Growth form       | Leaf size  | Secondary chemical compounds             | Relevant Papilionidae species                                  |
|----------|--------------------------------|-------------------|------------|------------------------------------------|----------------------------------------------------------------|
|          | <i>Cydonia oblonga</i>         | Tree, Shrub (261) | Wide (235) | Phenolic (231)                           | <i>P. glaucus</i>                                              |
|          | <i>Malus pumila</i>            | Tree (261)        | Wide (261) | Phenolic (112)                           | <i>P. canadensis, P. glaucus, P. rutulus</i>                   |
|          | <i>Prunus americana</i>        | Tree, Shrub (261) | Wide (261) | Phenolic (3)                             | <i>P. glaucus, P. multicaudatus, P. rutulus</i>                |
|          | <i>Prunus armenitaca</i>       | Tree (261)        | Wide (261) | Phenolic (158)                           | <i>P. rutulus, Iphiclides podalirius</i>                       |
|          | <i>Prunus capuli</i>           | Tree, Shrub (261) | Wide (261) | Phenolic (187)                           | <i>P. multicaudatus</i>                                        |
|          | <i>Prunus caroliniana</i>      | Tree, Shrub (261) | Wide (261) | Phenolic (99)                            | <i>P. rutulus</i>                                              |
|          | <i>Prunus cerasus</i>          | Tree, Shrub (261) | Wide (235) | Phenolic (255)                           | <i>P. canadensis, P. glaucus, P. multicaudatus, P. rutulus</i> |
|          | <i>Prunus domestica</i>        | Tree (261)        | Wide (235) | Phenolic (265)                           | <i>P. glaucus, P. rutulus, Iphiclides podalirius</i>           |
|          | <i>Prunus emarginata</i>       | Tree, Shrub (261) | Wide (261) | Phenolic (212)                           | <i>P. multicaudatus, P. rutulus</i>                            |
|          | <i>Prunus ilicifolia</i>       | Tree, Shrub (261) | Wide (261) | Cyanogenic glycosides (217)              | <i>P. rutulus</i>                                              |
|          | <i>Prunus pennsylvanica</i>    | Tree, Shrub (261) | Wide (261) |                                          | <i>P. canadensis, P. glaucus</i>                               |
|          | <i>Prunus persica</i>          | Tree (261)        | Wide (235) | Phenolic (41)                            | <i>P. canadensis, P. rutulus, Iphiclides podalirius</i>        |
|          | <i>Prunus serotina</i>         | Tree, Shrub (261) | Wide (235) | Cyanogenic glycosides (217)              | <i>P. canadensis, P. glaucus</i>                               |
| Rosaceae | <i>Prunus virginiana</i>       | Tree, Shrub (261) | Wide (261) | Cyanogenic glycosides (217)              | <i>P. canadensis, P. glaucus, P. multicaudatus, P. rutulus</i> |
|          | <i>Sorbus americana</i>        | Tree, Shrub (261) | Wide (261) | Phenolic (173)                           | <i>P. canadensis</i>                                           |
|          | <i>Vauquelinia californica</i> | Tree, Shrub (261) | Wide (261) |                                          | <i>P. multicaudatus</i>                                        |
| Rutaceae | <i>Aegle marmelos</i>          | Tree (39)         | Wide (259) | Terpenoid, Alkaloid, Coumarin (131, 230) | <i>P. demoleus malayanus, P. polytes</i>                       |
|          | <i>Aegle sepiario</i>          | Tree (234)        | Wide (234) | Coumarin (131)                           | <i>P. xuthus</i>                                               |
|          | <i>Amyris elemifera</i>        | Tree, Shrub (261) | Wide (70)  | Coumarin (38)                            | <i>P. cressphontes</i>                                         |
|          | <i>Atalantia buxifolia</i>     | Shrub, small (42) | Wide (288) | Coumarin (91)                            | <i>P. helenus</i>                                              |

| Family   | Species                     | Growth form             | Leaf size    | Secondary chemical compounds | Relevant Papilionidae species                                                                                                                                       |
|----------|-----------------------------|-------------------------|--------------|------------------------------|---------------------------------------------------------------------------------------------------------------------------------------------------------------------|
|          | <i>Atalantia spinosa</i>    | Tree (237)              |              | Coumarin (91)                | <i>P. polytes</i>                                                                                                                                                   |
|          | <i>Calodendron capensis</i> | Tree (238)              |              |                              | <i>P. demodocus</i> Kenya                                                                                                                                           |
|          | <i>Calodendron spp.</i>     |                         |              |                              | <i>P. rex</i>                                                                                                                                                       |
|          | <i>Casimiroa edulis</i>     | Tree (14)               | Wide (70)    | Coumarin (82)                | <i>P. crespfontes</i>                                                                                                                                               |
|          | <i>Choisya dumosa</i>       | Shrub (261)             | Narrow (261) | Alkaloid (155)               | <i>P. anchisiades</i>                                                                                                                                               |
|          | <i>Citrus aurantiaca</i>    | Tree, Shrub (70)        | Wide (70)    | Coumarin (98)                | <i>P. anchisiades, P. erostratus</i>                                                                                                                                |
|          | <i>Citrus aurantium</i>     | Tree, Shrub (261)       | Wide (70)    | Coumarin (98)                | <i>P. crespfontes, P. helenus, P. xuthus</i>                                                                                                                        |
|          | <i>Citrus australasica</i>  | Tree, small (20)        | Wide (174)   | Terpenoid (35)               | <i>P. aegeus, P. anactus</i>                                                                                                                                        |
|          | <i>Citrus australis</i>     | Shrub, small Tree (78)  | Wide (259)   | Terpenoid (35)               | <i>P. aegeus, P. anactus, P. demoleus malayanus, P. demoleus sthenelus</i>                                                                                          |
|          | <i>Citrus deliciosa</i>     | Shrub, small Tree (237) | Wide (259)   | Coumarin (247)               | <i>P. demoleus malayanus, P. polytes, P. protenor</i>                                                                                                               |
|          | <i>Citrus depressa</i>      | Shrub, small Tree (43)  | Wide (259)   | Alkaloid (277)               | <i>P. bianor, P. helenus</i>                                                                                                                                        |
|          | <i>Citrus garrawayae</i>    | Shrub (26)              | Wide (259)   | Coumarin (98)                | <i>P. aegeus, P. anactus</i>                                                                                                                                        |
|          | <i>Citrus glauca</i>        | Tree, Shrub (26)        | Wide (174)   | Terpenoid (35)               | <i>P. anactus</i>                                                                                                                                                   |
|          | <i>Citrus inodora</i>       | Shrub, Tall (20)        | Wide (259)   | Terpenoid (35)               | <i>P. aegeus, P. anactus</i>                                                                                                                                        |
|          | <i>Citrus junos</i>         | Tree, small (243)       | Wide (259)   | Alkaloid (126)               | <i>P. bianor, P. helenus, P. memnon, P. protenor, P. xuthus</i>                                                                                                     |
| Rutaceae | <i>Citrus limon</i>         | Tree, Shrub (261)       | Wide (261)   | Coumarin (2)                 | <i>P. anchisiades, P. asiyalus, P. crespfontes, P. demoleus malayanus, P. erostratus, P. hectorides, P. polytes, P. protenor, P. thoas, P. torquatus, P. xuthus</i> |
|          | <i>Citrus limonia</i>       | Tree, Shrub (261)       | Wide (261)   | Coumarin (2)                 | <i>P. helenus</i>                                                                                                                                                   |

| Family   | Species                        | Growth form             | Leaf size    | Secondary chemical compounds | Relevant Papilionidae species                                                                                                   |
|----------|--------------------------------|-------------------------|--------------|------------------------------|---------------------------------------------------------------------------------------------------------------------------------|
|          | <i>Citrus maxima</i>           | Tree, Shrub (261)       | Wide (70)    | Alkaloid, Coumarin (69, 276) | <i>P. helenus</i>                                                                                                               |
|          | <i>Citrus microcarpa</i>       | Tree, shrub (237)       | Wide (259)   | Coumarin (98)                | <i>P. bianor, P. helenus</i>                                                                                                    |
|          | <i>Citrus natsudaoides</i>     | Tree (259)              | Wide (259)   | Coumarin (283)               | <i>P. helenus, P. memnon, P. protenor, P. xuthus</i>                                                                            |
|          | <i>Citrus nobilis</i>          | Tree, small (243)       | Wide (259)   | Phenolic (275)               | <i>P. xuthus</i>                                                                                                                |
|          | <i>Citrus obovoidea</i>        | Tree (259)              | Wide (259)   | Coumarin (98)                | <i>P. xuthus</i>                                                                                                                |
|          | <i>Citrus paradisi</i>         | Tree, Shrub (39)        | Wide (261)   | Coumarin (156, 160)          | <i>P. helenus</i>                                                                                                               |
|          | <i>Citrus reticulata</i>       | Tree, Shrub (261)       | Wide (70)    | Coumarin (284, 214)          | <i>P. asybalus, P. hectorides, P. helenus, P. thoas</i>                                                                         |
|          | <i>Citrus sinensis</i>         | Tree, Shrub (261)       | Wide (70)    | Coumarin (98)                | <i>P. anchisiades, P. asybalus, P. cresphontes, P. erostratus, P. hectorides, P. helenus, P. memnon, P. thoas, P. torquatus</i> |
|          | <i>Citrus tachibana</i>        | Tree (184)              | Wide (259)   |                              | <i>P. bianor, P. helenus</i>                                                                                                    |
|          | <i>Citrus tamurana</i>         | Tree (259)              | Wide (259)   | Coumarin (127)               | <i>P. xuthus</i>                                                                                                                |
|          | <i>Clausena anisata</i>        | Shrub, small Tree (271) | Wide (108)   | Coumarin (178)               | <i>P. demodocus Kenya, P. lormieri</i>                                                                                          |
|          | <i>Clausena brevistyla</i>     | Shrub (20)              | Wide (259)   | Coumarin (125)               | <i>P. aegeus</i>                                                                                                                |
|          | <i>Clausena excavata</i>       | Shrub (109)             | Wide (75)    | Coumarin (118)               | <i>P. polytes</i>                                                                                                               |
|          | <i>Clausena inaequalis</i>     | Shrub, small Tree (27)  | Wide (259)   | Coumarin (134)               | <i>P. demodocus Kenya</i>                                                                                                       |
|          | <i>Clausena lansium</i>        | Tree, Evergreen (192)   | Wide (259)   | Coumarin (145)               | <i>P. helenus</i>                                                                                                               |
|          | <i>Clausena willdenovii</i>    | Tree, small (80)        | Wide (259)   | Coumarin (134)               | <i>P. bianor, P. nephelus</i>                                                                                                   |
| Rutaceae | <i>Dictamnus albus</i>         | Herb, perennial (261)   | Wide (261)   | Coumarin (120)               | <i>P. cresphontes, P. machaon, P. polyxenes</i>                                                                                 |
|          | <i>Dinosperma erythrocoeca</i> | Tree (102)              | Wide (102)   | Amide, Coumarin (139)        | <i>P. aegeus</i>                                                                                                                |
|          | <i>Dinosperma melanophloia</i> | Tree (102)              | Wide (102)   | Amide, Coumarin (140)        | <i>P. aegeus</i>                                                                                                                |
|          | <i>Eremocitrus glauca</i>      | Shrub (20)              | Narrow (259) | Coumarin (64)                | <i>P. anactus</i>                                                                                                               |

| Family   | Species                         | Growth form                  | Leaf size    | Secondary chemical compounds | Relevant Papilionidae species                                                                       |
|----------|---------------------------------|------------------------------|--------------|------------------------------|-----------------------------------------------------------------------------------------------------|
|          | <i>Eriostemon australasius</i>  | Shrub (23)                   | Narrow (174) | Alkaloid, Coumarin (54)      | <i>P. aegeus</i>                                                                                    |
|          | <i>Esenbeckia febrifuga</i>     | Tree, Shrub (129)            | Wide (177)   | Coumarin (172)               | <i>P. anchistoides, P. asyctalus, P. thoas, P. torquatus</i>                                        |
|          | <i>Esenbeckia leiocarpa</i>     | Tree (129)                   | Wide (177)   | Alkaloid, Coumarin (171)     | <i>P. anchistoides, P. asyctalus, P. thoas, P. torquatus</i>                                        |
|          | <i>Euodia danielli</i>          | Tree (109)                   | Wide (79)    | Phenolic, Coumarin (281)     | <i>P. bianor</i>                                                                                    |
|          | <i>Euodia glabrifolia</i>       |                              |              | Coumarin (262)               | <i>P. bianor, P. helenus</i>                                                                        |
|          | <i>Euodia lepta</i>             | Tree, small (43)             | Wide (106)   | Coumarin (262)               | <i>P. bianor</i>                                                                                    |
|          | <i>Euxylophora paraensis</i>    | Tree (233)                   |              | Alkaloid (128)               | <i>P. hectorides, P. torquatus</i>                                                                  |
|          | <i>Evodia glauca</i>            | Tree (109)                   | Wide (259)   | Terpenoid (169)              | <i>P. bianor, P. helenus, P. maaekii, P. nephelus, P. paris, P. polytes, P. protenor, P. xuthus</i> |
|          | <i>Evodia merrillii</i>         | Tree, Evergreen (177)        | Wide (177)   | Terpenoid (12)               | <i>P. paris</i>                                                                                     |
|          | <i>Evodia roxburghiana</i>      | Tree, Evergreen, small (237) | Wide (288)   | Terpenoid (12)               | <i>P. paris</i>                                                                                     |
|          | <i>Evodia rutaecarpa</i>        | Tree (79)                    | Wide (79)    | Terpenoid (12)               | <i>P. protenor, P. xuthus</i>                                                                       |
|          | <i>Evodia semecarpifolia</i>    | Tree (109)                   | Wide (79)    | Terpenoid (12)               | <i>P. paris</i>                                                                                     |
|          | <i>Fagaropsis angolensis</i>    | Tree (84)                    | Wide (108)   | Alkaloid (133)               | <i>P. demodocus Kenya</i>                                                                           |
|          | <i>Flindersia australis</i>     | Tree (150)                   | Wide (33)    | Coumarin (206)               | <i>P. aegeus</i>                                                                                    |
|          | <i>Flindersia bennettii</i>     | Tree (150)                   | Wide (33)    | Coumarin (206)               | <i>P. aegeus</i>                                                                                    |
|          | <i>Flindersia collina</i>       | Tree (100)                   | Wide (33)    | Coumarin (9)                 | <i>P. aegeus</i>                                                                                    |
|          | <i>Flindersia ijflaiana</i>     | Tree (78)                    |              | Alkaloid (90)                | <i>P. aegeus</i>                                                                                    |
|          | <i>Flindersia laevicarpa</i>    | Tree (78)                    |              | Terpenoid (196)              | <i>P. aegeus</i>                                                                                    |
|          | <i>Flindersia oppositifolia</i> |                              |              | Alkaloid (32)                | <i>P. aegeus</i>                                                                                    |
|          | <i>Flindersia pimenteliana</i>  | Tree (78)                    |              | Alkaloid (32)                | <i>P. aegeus</i>                                                                                    |
| Rutaceae | <i>Flindersia schottiana</i>    | Tree (150)                   |              | Alkaloid (105)               | <i>P. aegeus</i>                                                                                    |
|          | <i>Fortunella hindsii</i>       | Tree, Shrub (243)            |              | Flavanoid (183)              | <i>P. helenus</i>                                                                                   |

| Family | Species                           | Growth form                    | Leaf size    | Secondary chemical compounds  | Relevant Papilionidae species                                                              |
|--------|-----------------------------------|--------------------------------|--------------|-------------------------------|--------------------------------------------------------------------------------------------|
|        | <i>Fortunella japonica</i>        | Shrub (261)                    | Wide (261)   | Flavanoid (183)               | <i>P. helenus, P. memnon, P. protenor</i>                                                  |
|        | <i>Gejera parviflora</i>          | Tree, Small / Shrub, Tall (20) | Wide (15)    | Coumarin (65)                 | <i>P. aegaeus, P. anactus</i>                                                              |
|        | <i>Gejera salicifolia</i>         | Tree, Small / Shrub, Tall (20) | Wide (15)    | Alkaloid, Coumarin (124, 138) | <i>P. aegaeus</i>                                                                          |
|        | <i>Glycosmis cochinchinensis</i>  | Shrub (137)                    | Wide (288)   | Alkaloid (117)                | <i>P. polytes</i>                                                                          |
|        | <i>Glycosmis parviflora</i>       | Tree, small, Shrub (109)       | Wide (79)    | Alkaloid (119)                | <i>P. helenus, P. polytes</i>                                                              |
|        | <i>Halfordia</i> spp.             | Tree, small (20)               |              | Alkaloid, Coumarin (103, 240) | <i>P. aegaeus</i>                                                                          |
|        | <i>Haplophyllum balcanicum</i>    | Herb, perennial (258)          | Narrow (260) | Coumarin (85)                 | <i>P. machaon</i>                                                                          |
|        | <i>Haplophyllum linifolium</i>    | Herb, perennial (258)          | Narrow (260) | Coumarin (85)                 | <i>P. machaon</i>                                                                          |
|        | <i>Haplophyllum tuberculatum</i>  | Herb, perennial (254)          | Narrow (260) | Alkaloid (5)                  | <i>P. machaon</i>                                                                          |
|        | <i>Helictia</i> spp.              | Tree, Shrub (261)              | Wide (261)   | Alkaloid, Coumarin (60)       | <i>P. hectorides</i>                                                                       |
|        | <i>Leionema ambiens</i>           | Shrub (270)                    | Wide (174)   |                               | <i>P. aegaeus</i>                                                                          |
|        | <i>Leionema dentatum</i>          | Shrub, small Tree (270)        | Wide (174)   |                               | <i>P. aegaeus</i>                                                                          |
|        | <i>Micromelum minutum</i>         | Tree, small (20)               | Wide (177)   | Coumarin (201)                | <i>P. aegaeus, P. nephelus</i>                                                             |
|        | <i>Murraya exotica</i>            | Tree, Shrub (261)              | Wide (261)   | Alkaloid, Coumarin (81, 116)  | <i>P. polytes</i>                                                                          |
|        | <i>Murraya koenigii</i>           | Shrub, small Tree (192)        | Wide (259)   | Alkaloid, Coumarin (122, 166) | <i>P. polytes</i>                                                                          |
|        | <i>Orixa japonica</i>             | Shrub (184)                    | Wide (177)   | Alkaloid, Coumarin (61)       | <i>P. bianor, P. maackii, P. macilentus</i>                                                |
|        | <i>Paramignya griffithii</i>      | Shrub (210)                    | Wide (177)   | Terpene (268)                 | <i>P. memnon</i>                                                                           |
|        | <i>Phellodendron sachalinense</i> | Tree (184)                     | Wide (177)   | Alkaloid (29)                 | <i>P. bianor, P. helenus, P. maackii, P. xuthus</i>                                        |
|        | <i>Philothea myoporoides</i>      | Shrub (100)                    | Narrow (174) | Coumarin (241)                | <i>P. aegaeus</i>                                                                          |
|        | <i>Poncirus trifoliata</i>        | Tree, Shrub (261)              | Wide (261)   | Alkaloid, Coumarin (66, 93)   | <i>P. bianor, P. helenus, P. macilentus, P. memnon, P. polytes, P. protenor, P. xuthus</i> |
|        | <i>Ptelea baldwinii</i>           |                                |              | Coumarin (269)                | <i>P. multicaudatus, P. rutulus</i>                                                        |
|        | <i>Ptelea crenulata</i>           | Tree, Shrub (261)              | Wide (261)   | Alkaloid, Coumarin (62)       | <i>P. multicaudatus</i>                                                                    |

| Family   | Species                          | Growth form                       | Leaf size    | Secondary chemical compounds | Relevant Papilionidae species                                                                                                                                           |
|----------|----------------------------------|-----------------------------------|--------------|------------------------------|-------------------------------------------------------------------------------------------------------------------------------------------------------------------------|
| Rutaceae | <i>Ptelea trifoliata</i>         | Tree, Shrub (261)                 | Wide (261)   | Alkaloid, Coumarin (62, 269) | <i>P. crespontes</i> , <i>P. glaucus</i> , <i>P. multicaudatus</i>                                                                                                      |
|          | <i>Ruta angustifolia</i>         | Herb, perennial (258)             | Narrow (260) | Coumarin (30)                | <i>P. machaon</i>                                                                                                                                                       |
|          | <i>Ruta chalepensis</i>          | Shrub, subshrub, herb (261)       | Narrow (261) | Alkaloid, Coumarin (92)      | <i>P. machaon</i>                                                                                                                                                       |
|          | <i>Ruta corsica</i>              | Shrub (16)                        | Narrow (260) | Alkaloid, Coumarin (25)      | <i>P. hospiton</i>                                                                                                                                                      |
|          | <i>Ruta graveolens</i>           | Shrub, subshrub, herb (261)       | Narrow (261) | Coumarin (185)               | <i>P. machaon</i> , <i>P. macilentus</i> , <i>P. polyxenes</i> , <i>P. thoas</i> , <i>P. anchisiades</i>                                                                |
|          | <i>Skimmia japonica</i>          | Shrub (184)                       | Wide (177)   | Coumarin, Terpenoid (170)    | <i>P. bianor</i> , <i>P. protenor</i> , <i>P. xuthus</i>                                                                                                                |
|          | <i>Teclea nobilis</i>            | Shrub, Evergreen (271)            | Wide (27)    | Alkaloid (6)                 | <i>P. dardanus</i> , <i>P. phorcas</i>                                                                                                                                  |
|          | <i>Teclea simplicifolia</i>      | Shrub, Evergreen, small Tree (84) | Wide (27)    | Alkaloid (273)               | <i>P. dardanus</i> , <i>P. phorcas</i>                                                                                                                                  |
|          | <i>Teclea stuhlmanni</i>         |                                   |              | Alkaloid (6)                 | <i>P. dardanus</i> , <i>P. rex</i>                                                                                                                                      |
|          | <i>Teclea tricocarpa</i>         | Tree, shrub (55)                  |              | Alkaloid (6)                 | <i>P. rex</i>                                                                                                                                                           |
|          | <i>Teclea villosa</i>            |                                   |              | Alkaloid (6)                 | <i>P. dardanus</i> , <i>P. phorcas</i>                                                                                                                                  |
|          | <i>Thamnosma montana</i>         | Shrub, subshrub (261)             | Narrow (261) | Alkaloid, Coumarin (44)      | <i>P.indra</i> , <i>P. polyxenes</i>                                                                                                                                    |
|          | <i>Thamnosma texana</i>          | Shrub, subshrub, herb (261)       | Narrow (261) | Alkaloid, Coumarin (182)     | <i>P. polyxenes</i>                                                                                                                                                     |
|          | <i>Toddalia asiatica</i>         | Tree (109)                        | Wide (177)   | Alkaloid, Coumarin (225)     | <i>P. dardanus</i> , <i>P. demodocus</i><br>Kenya, <i>P. helenus</i> , <i>P. nephelus</i> , <i>P. paris</i> , <i>P. polytes</i> , <i>P. protenor</i> , <i>P. xuthus</i> |
|          | <i>Triphasia trifolia</i>        | Tree, Shrub (261)                 | Wide (261)   | Alkaloid, Coumarin (1)       | <i>P. polytes</i>                                                                                                                                                       |
|          | <i>Vepris eugenifolia</i>        | Shrub (84)                        | Wide (27)    | Alkaloid (132)               | <i>P. dardanus</i>                                                                                                                                                      |
|          | <i>Vepris spp.</i>               | Shrub, small Tree (55)            | Wide (177)   |                              | <i>P. lomieri</i> , <i>P. rex</i>                                                                                                                                       |
|          | <i>Zanthoxylum acanthopodium</i> | Shrub (109)                       | Wide (177)   | Alkaloid (57)                | <i>P. bianor</i> , <i>P. protenor</i>                                                                                                                                   |

| Family   | Species                            | Growth form           | Leaf size  | Secondary chemical compounds | Relevant Papilionidae species                                                                                                                                        |
|----------|------------------------------------|-----------------------|------------|------------------------------|----------------------------------------------------------------------------------------------------------------------------------------------------------------------|
| Rutaceae | <i>Zanthoxylum ailanthoides</i>    | Tree (109)            | Wide (177) | Alkaloid, Coumarin (47, 226) | <i>P. bianor</i> , <i>P. helenus</i> , <i>P. maackii</i> , <i>P. macilentus</i> , <i>P. nephelus</i> , <i>P. protenor</i> , <i>P. xuthus</i>                         |
|          | <i>Zanthoxylum americanum</i>      | Tree, Shrub (261)     | Wide (261) | Alkaloid, Coumarin (242)     | <i>P. anchisiades</i> , <i>P. crespshontes</i> , <i>P. glaucus</i> , <i>P. thoas</i>                                                                                 |
|          | <i>Zanthoxylum armatum</i>         | Shrub (109)           | Wide (177) | Alkaloid, Terpenoid (223)    | <i>P. paris</i> , <i>P. protenor</i> , <i>P. polytes</i> , <i>P. xuthus</i>                                                                                          |
|          | <i>Zanthoxylum avicennae</i>       | Tree (123)            | Wide (177) | Alkaloid, Coumarin (267)     | <i>P. helenus</i> , <i>P. paris</i>                                                                                                                                  |
|          | <i>Zanthoxylum beecheyanum</i>     | Shrub (266)           | Wide (177) | Alkaloid, Coumarin (48)      | <i>P. protenor</i> , <i>P. xuthus</i>                                                                                                                                |
|          | <i>Zanthoxylum brachyachanthum</i> | Tree (20)             | Wide (174) | Alkaloid, Coumarin (179)     | <i>P. aegeus</i>                                                                                                                                                     |
|          | <i>Zanthoxylum clava-herculis</i>  | Tree, Shrub (261)     | Wide (261) | Alkaloid, Coumarin (72)      | <i>P. anchisiades</i> , <i>P. crespshontes</i> , <i>P. thoas</i>                                                                                                     |
|          | <i>Zanthoxylum cuspidata</i>       | Shrub, scandent (266) | Wide (70)  | Alkaloid, Coumarin (114)     | <i>P. demoleus malayanus</i> , <i>P. polytes</i> , <i>P. protenor</i> , <i>P. helenus</i>                                                                            |
|          | <i>Zanthoxylum elephanitiasis</i>  | Tree (4)              | Wide (70)  | Alkaloid, Coumarin (73)      | <i>P. anchisiades</i> , <i>P. crespshontes</i> , <i>P. thoas</i>                                                                                                     |
|          | <i>Zanthoxylum fagara</i>          | Tree, Shrub (261)     | Wide (70)  | Alkaloid, Coumarin (63)      | <i>P. anchisiades</i> , <i>P. crespshontes</i> , <i>P. thoas</i>                                                                                                     |
|          | <i>Zanthoxylum gillettii</i>       | Tree (274)            | Wide (70)  |                              | <i>P. lormieri</i>                                                                                                                                                   |
|          | <i>Zanthoxylum hirsutum</i>        | Tree, Shrub (261)     | Wide (261) | Alkaloid, Coumarin (179)     | <i>P. crespshontes</i>                                                                                                                                               |
|          | <i>Zanthoxylum latispinosum</i>    |                       |            | Alkaloid, Coumarin (179)     | <i>P. anchisiades</i> , <i>P. thoas</i>                                                                                                                              |
|          | <i>Zanthoxylum myriacanthum</i>    | Tree (210)            | Wide (70)  | Alkaloid (239)               | <i>P. helenus</i>                                                                                                                                                    |
|          | <i>Zanthoxylum nitidum</i>         | Shrub, scandent (109) | Wide (177) | Alkaloid (115, 58)           | <i>P. aegeus</i> , <i>P. bianor</i> , <i>P. demoleus malayanus</i> , <i>P. helenus</i> , <i>P. paris</i> , <i>P. polytes</i> , <i>P. protenor</i> , <i>P. xuthus</i> |

| Family     | Species                         | Growth form                  | Leaf size  | Secondary chemical compounds | Relevant Papilionidae species                                                   |
|------------|---------------------------------|------------------------------|------------|------------------------------|---------------------------------------------------------------------------------|
|            | <i>Zanthoxylum ovalifolium</i>  | Tree (109)                   | Wide (79)  | Alkaloid, Terpenoid (246)    | <i>P. nephetus</i> , <i>P. paris</i>                                            |
|            | <i>Zanthoxylum oxyphyllum</i>   | Tree (137)                   |            | Alkaloid (251)               | <i>P. bianor</i> , <i>P. protenor</i>                                           |
| Rutaceae   | <i>Zanthoxylum piperitum</i>    | Shrub (184)                  | Wide (177) | Alkaloid (252)               | <i>P. bianor</i> , <i>P. macilentus</i> , <i>P. protenor</i> , <i>P. xuthus</i> |
|            | <i>Zanthoxylum reticulata</i>   |                              |            | Alkaloid, Coumarin (179)     | <i>P. anchistades</i>                                                           |
|            | <i>Zanthoxylum rhetsa</i>       |                              |            | Alkaloid (88)                | <i>P. helenus</i> , <i>P. nephelus</i>                                          |
|            | <i>Zanthoxylum rhoifolium</i>   | Shrub, Small Tree (197)      | Wide (70)  | Alkaloid, Coumarin (13)      | <i>P. anchistades</i> , <i>P. hectorides</i> , <i>P. thoas</i>                  |
|            | <i>Zanthoxylum scandens</i>     | Shrub, thorny climbing (109) | Wide (177) | Alkaloid, Coumarin (179)     | <i>P. helenus</i>                                                               |
|            | <i>Zanthoxylum schinifolium</i> | Shrub (184)                  | Wide (79)  | Alkaloid, Coumarin (46)      | <i>P. bianor</i> , <i>P. macilentus</i> , <i>P. protenor</i> , <i>P. xuthus</i> |
|            | <i>Zanthoxylum setulosum</i>    | Tree (67)                    | Wide (70)  | Alkaloid, Coumarin (179)     | <i>P. anchistades</i> , <i>P. crespiphontes</i> , <i>P. thoas</i>               |
|            | <i>Zieria laevigata</i>         | Shrub (20)                   |            | Cyanogenic glycosides (71)   | <i>P. aegeus</i>                                                                |
|            | <i>Zieria smithii</i>           | Tree, Shrub (20)             |            | Phenolic (195)               | <i>P. aegeus</i>                                                                |
| Salicaceae | <i>Salix babylonica</i>         | Tree (261)                   | Wide (278) | Phenolic (224)               | <i>P. rutulus</i>                                                               |
|            | <i>Salix exigua</i>             | Tree, Shrub (261)            | Wide (261) | Phenolic (220)               | <i>P. rutulus</i>                                                               |
|            | <i>Salix hookeriana</i>         | Tree, Shrub (261)            | Wide (40)  | Phenolic (50)                | <i>P. rutulus</i>                                                               |
|            | <i>Salix lasiolepis</i>         | Tree, Shrub (261)            | Wide (261) | Phenolic (199)               | <i>P. rutulus</i>                                                               |
|            | <i>Salix lucida</i>             | Tree, Shrub (261)            | Wide (261) | Phenolic (205)               | <i>P. rutulus</i>                                                               |
|            | <i>Salix scouleriana</i>        | Tree, Shrub (261)            | Wide (261) | Phenolic (285)               | <i>P. rutulus</i>                                                               |
| Tiliaceae  | <i>Tilia americana</i>          | Tree (261)                   | Wide (278) | Phenolic (211)               | <i>P. canadensis</i>                                                            |

1. Abaul, J., Philogene, E., Bourgeois, P., Poupat, C., Ahond, A., Potier, P. (1994) *Journal of Natural Products* **57**, 846-848.

2. Abdel-Fattah, M.E., Taha, K.E., Abdel Aziz, M.H., Missalem, A.A., El-Khrisy, E.A.M. (2003) *Indian Journal of Heterocyclic Chemistry* **13**, 45-48.



3. Acuna U.M., Atha D.E., Ma, J., Nee M.H., Kennelly E.J. (2002) *Phytotherapy research* : PTR **16**, 63-65.
4. Adams, C.D. (1972) *Flowering plants of Jamaica* (University of the West Indies, Jamaica).
5. Al-Rehaily, A.J., Al-Howiriny, T.A., Ahmad, M.S., Al-Yahya, M.A., El-Ferally, F.S., Hufford, C.D., McPhail, A.T. (2001) *Phytochemistry* **57**, 597-602.
6. Al-Rehaily, A.J., Ahmad, M.S., Muhammad, I., Al-Thukair, A.A., Perzanowski, H.P. (2003) *Phytochemistry* **64**, 1405-1411.
7. Amaral, J.S., Ferreres, F., Andrade, P.B., Valentao, P., Pinheiro, C., Santos, A., Seabra, R. (2005) *Natural Product Research* **19**, 157-163.
8. Anderberg, A. (1999) *The Linnean Herbarium* (Department of Phanerogamic Botany, The Swedish Museum of Natural History, Stockholm, Sweden) <http://linnaeus.nrm.se>.
9. Anet, F.A.L., Blanks, F.R., Hughes, G.K. (1949) *Australian Journal Science Research* **2A**, 127-131.
10. Appendino, G., Valle, Maria G., Gariboldi, P. (1987) *Phytochemistry* **26**, 1755-1757.
11. Appendino, G., Bianchi, F., Bader, A., Campagnuolo, C., Fattorusso, E., Tagliatalata-Scafati, O., Blanco-Molina, M., Macho, A., Fiebich, B.L., Bremner, P., Heinrich, M., Ballero, M., Munoz, E. (2004) *Journal of Natural Products* **67**, 532-536.
12. Arisawa, M., Horiuchi, T., Hayashi, T., Tezuka, Y., Kikuchi, T., Morita, N. (1993) *Chemical & Pharmaceutical Bulletin* **41**, 1472-1474.
13. Arruda, M.S.P., Fernandes, J.B., Vieira, P.C., Da Silva, M.F.G.F., Pirani, J.R. (1992) *Biochemical Systematics and Ecology* **20**, 173-178.
14. Arzeni, C.B. and T.M. Simon (1974) *Plants of Mexico* (Eastern Illinois University Press, Charleston, IL).
15. Ashwath, N., Fesuk, S., Heard, B., Dodd, B. and Hood, B. (2003) *Seed germination and storage data, and images of plant and seed of over 500 tree, shrub, forb and grass species and provenances of Central Queensland, Australia*. <http://seedbank.cqu.edu.au>.
16. Aubert, J., Descimon, H., Michel, F. (1996) *Biological Conservation* **78**, 247-255.

17. Baba, K., Yoneda, Y., Kozawa, M., Fujita, E., Wang, N., Yuan, C. (1989) *Shoyakugaku Zasshi* **43**, 216-221.
18. Babcock, P.A., Segelman, A.B. (1974) *Journal of Pharmaceutical Sciences* **63**, 1495-1496.
19. Bagirov, V.Y., Belyi, M.B. (1982) *Khimiya Prirodnykh Soedinenii* **2**, 250-251.
20. Bailey, F.M. (1899) *The Queensland Flora* (H.J. Diddams and Co., Brisbane).
21. Baldwin, I.T., Schultz, J.C., Ward, D. (1987) *Journal of Chemical Ecology* **13**, 1069-1078.
22. Baser, K.H.C., Kurkcoglu, M., Vural, M. (1998) *Journal of Essential Oil Research* **10**, 593-594.
23. Beadle, N.C.W., R.C. Carolin and O.D. Evans (1972) *Flora of the Sydney region* (Reed, Sydney).
24. Berenbaum, M. (1981) *Ecology* **62**, 1254-1266.
25. Bertrand, C., Fabre, N., Moulis, C. (2004) *Fitoterapia* **75**, 242-244.
26. Birmingham, E. (1998) *Australian native Citrus: wild limes from the rainforest to the desert*.  
<http://www.newcrops.uq.edu.au/newslett/ncn10211.htm>.
27. Board of Trustees of the Royal Botanical Gardens, Kew (2004) *Flora Zambesiaca* (Royal Botanical Gardens, Kew, UK)  
<http://www.kew.org/floras/fz/intro.html>.
28. Bohlmann, F., Grenz, M. (1970) *Tetrahedron Letters* **17**, 1453-1456.
29. Bonte, F., Dumas, M., Saunois, A., Meybeck, A. (1999) *Pharmaceutical Biology* **37**, 77-79.
30. Borges del Castillo, J., Rodriguez, L.F., Secundino, L.F. (1987) *Anales de Quimica, Serie C: Quimica Organica y Bioquimica* **83**, 15-17.
31. Bourgaud, F., Poutaraud, A., Guckert, A. (1994) *Phytochemical Analysis* **5**, 127-132.
32. Bowden, B.F., Cleaver, L., Ndalut, P.K., Ritchie, E., Taylor, W.C. (1975) *Australian Journal of Chemistry* **28**, 1393-1395.
33. BRAIN (Brisbane Rainforest Action and Information Network) (2006) *Rainforest Plants Database* (Brisbane Rainforest Action & Information Network) <http://www.brisrain.webcentral.com.au>.

34. Brattsten, L.B., Evans, C.K., Bonetti, S., Zalkow, L.H. (1984) *Comparative Biochemistry and Physiology, Part C: Pharmacology, Toxicology & Endocrinology* **77C**, 29-37.
35. Brophy, J.J., Goldsack, R.J., Forster, P.I. (2001) *Journal of Essential Oil Research* **13**, 264-268.
35. Brophy, J.J., Goldsack, R.J., Forster, P.I. (2001) *Journal of Essential Oil Research* **13**, 5-7.
37. Burczyk, J., Wierzchowska-Renke, K., Glowniak, K., Glowniak, P., Marek, D. (2002) *Journal of Herbs, Spices & Medicinal Plants* **9**, 305-311.
38. Burke, B.A., Philip, S. (1981) *Heterocycles* **16**, 897-900.
39. Burkill, H.M. (1997) *The useful plants of west tropical Africa* (Royal Botanical Gardens, Kew, UK).
40. CalFlora: Information on California plants for education, research and conservation (2000) *The CalFlora Database*. <http://www.calflora.org>.
41. Cevallos-Casals, B.A., Byrne, D.H., Cisneros-Zevallos, L., Okie, W.R. (2002) *Acta Horticulturae* **592**, 589-592.
42. Chang, C.-E. (1976) in *Flora of Taiwan, volume 2*, eds. Li, H.-L. (Epoch Publishing, Taiwan), pp. 406-468.
43. Chang, C.-E. (1977) in *Flora of Taiwan, volume 3*, eds. Li, H.-L. (Epoch Publishing, Taiwan), pp. 506-537.
44. Chang, P.T.O., Cordell, G.A., Aynilian, G.H., Fong, H.H.S., Farnsworth, N.R. (1976) *Lloydia* **39**, 134-140.
45. Chazdon, R.L., S. Careaga, C. Webb, and O. Vargas (2003) *Ecological Monographs* **73**, 331-347.
46. Cheng, M.-J., Yang, C.-H., Lin, W.-Y., Tsai, I.-L., Chen, I.-S. (2002) *Journal of the Chinese Chemical Society (Taipei)* **49**, 125-128.
47. Cheng, M.-J., Tsai, I.-L., Chen, I.-S. (2003) *Journal of the Chinese Chemical Society* **50**, 1241-1246.
48. Cheng, M.-J., Wu, C.-C., Tsai, I.-L., Chen, I.-S. (2004) *Journal of the Chinese Chemical Society (Taipei)* **51**, 1065-1072.
49. Chulia, A.J., Bennini, B., Kaouadji, M., Allais, D.P., Delage, C. (1995) *Journal of Natural Products* **58**, 560-563.
50. Clark, R.H., Gillie, K.B. (1921) *American Journal of Pharmacy* **93**, 618-621.

51. Clausen, T.P., Reichardt, P.B., Bryant, J.P. (1986) *Journal of Chemical Ecology* **12**, 2117-2131.
52. Clausen, T.P., Evans, T.P., Reichardt, P.B., Bryant, J.P. (1989) *Journal of Natural Products* **52**, 207-209.
53. Cuong, N.M., Sung, T.V., Kamperdick, C., Adam, G. (1996) *Pharmazie* **51**, 128.
54. da Cunha, E.V.L., Armstrong, J.A., Gray, A.I., Hockless, D.C.R., Waterman, P.G., White, A.H. (1993) *Australian Journal of Chemistry* **46**, 1507-1514.
55. Dale, I.R. and P.J. Greenway (1961) *Kenya trees and shrubs* (Buchanan's Kenya Estates Limited, London).
56. De Araujo-Junior, J.X., Da-Cunha, E.V.L., Chaves, M.C.d.O., Gray, A.I. (1997) *Phytochemistry* **44**, 559-561.
57. Deshpande, V.H., Shastri, R.K. (1977) *Indian Journal of Chemistry, Section B: Organic Chemistry Including Medicinal Chemistry* **15**, 95-96.
58. Deyun, K., Gray, A.I., Hartley, T.G., Waterman, P.G. (1996) *Biochemical Systematics and Ecology* **24**, 87-88.
59. Dittmann, L. (2000) *Apiaceae. Vascular Plants of Henry W. Coe State Park, CA*. <http://www.coestatepark.com/apiaceae.htm>.
60. Dominguez, X.A., Franco, R., Garcia, S., Merjianian, A., Espinoza, G., Tamez, R.S., Zilli, A.B. (1986) *Revista Latinoamericana de Quimica* **17**, 60-62.
61. Donnelly, W.J., Grundon, M.F. (1972) *Journal of the Chemical Society: Organic and Bio-Organic Chemistry* **16**, 2116-2118.
62. Dreyer, D.L. (1969) *Phytochemistry* **8**, 1013-1020.
63. Dreyer, D.L., Brenner, R.C. (1980) *Phytochemistry* **19**, 935-939.
64. Dreyer, D.L., Huey, P.F. (1974) *Phytochemistry* **13**, 1237-1239.
65. Dreyer, D.L., Lee, A. (1972) *Phytochemistry* **11**, 763-767.
66. El-Shamy, A.M., Shehata, A.H., Eid, H.M.M. (2001) *Egyptian Journal of Biomedical Sciences* **8**, 145-154.

67. Enquist, B.J. and J.J. Sullivan (2001) *Vegetative key and descriptions of tree species of the tropical dry forests of upland sector Santa Rosa, Area de Conservacion Guanacaste, Costa Rica* (Area de Conservacion Guanacaste) [http://www.acguanacaste.ac.cr/paginas\\_especie/plantae\\_online/EnquistSullivanTreeKey.pdf](http://www.acguanacaste.ac.cr/paginas_especie/plantae_online/EnquistSullivanTreeKey.pdf).
68. Erickson, R.L., Pearl, I.A., Darling, S.F. (1970) *Phytochemistry* **9**, 857-863.
69. Feng, B., Yuan, Y., Pei, Y. (2001) *Shenyang Yaoke Daxue Xuebao* **18**, 228-232.
70. Field Museum (2005) *Chicago Field Museum Neotropical Herbaria* (The Field Museum, Chicago, IL) <http://fm1.fieldmuseum.org/vrrc>.
71. Finmore, H., Cooper, J.M. (1936) *Journal and Proceedings of the Royal Society of New South Wales* **70**, 175-182.
72. Fish, F., Gray, A.I., Waterman, P.G., Donachie, F. (1975) *Lloydia* **38**, 268-270.
73. Fish, F., Gray, A.I., Waterman, P.G. (1976) *Journal of Pharmacy and Pharmacology* **28(Suppl.)**, 1-69.
74. Flora of North America Editorial Committee, eds. (2004) *Flora of North America North of Mexico. 12+ vols.* <http://hua.huh.harvard.edu/FNA>.
75. Flora of Taiwan Editorial Committee (2001) *Flora of Taiwan* (Missouri Botanical Garden, St. Louis, MO) <http://www.efloras.org/index.aspx>.
76. Florya, V.N. (1971) *Izvestiya Akademii Nauk Moldavskoi SSR, Biologicheskie i Khimicheskie Nauki* **6**, 77-80.
77. Florya, V.N., Kretsu, L.G. (1980) *Izvestiya Akademii Nauk Moldavskoi SSR, Biologicheskie i Khimicheskie Nauki* **2**, 89-91.
78. Francis, W.D. (1981) *Australian rain-forest trees* (Australian Government Publication Service, Canberra).
79. Fujii, N. (2003) *Flora of Japan* (Japanese Society for Plant Systematics, Tsukuba City, Ibaraki, Japan.) <http://foj.c.u-tokyo.ac.jp/gbif/foj>.
80. Gandhi, K.N. (1976) in *Flora of Hassan district, Karnataka, India*, eds. Saldanha, C.J. and D.H. Nicolson. (Amerind Publishing Co. Pvt. Ltd., New Delhi), pp. 379-389.

81. Ganguly, S.N., Sarkar, A. (1978) *Phytochemistry* **17**, 1816-1817.
82. Garcia-Argaez, A.N., Gonzalez-Lugo, N.M., Marquez, C., Martinez-Vazquez, M. (2003) *Revista de la Sociedad Quimica de Mexico* **47**, 151-154.
83. Giannasi, D.E., Chuang, T.I. (1976) *Brittonia* **28**, 177-194.
84. Gilbert, M.G. (1989) in *Flora of Ethiopia, volume 3*, eds. Hedberg, I. and S. Edwards. (Addis Ababa University, Addis Ababa, Ethiopia), pp. 419-432.
85. Gonzalez G.A., Cardona, R.J., Moreno O.R., Rodriguez L.F. (1973) *Anales de Quimica* **69**, 781-786.
86. Gonzalez G.A., Cardona, R.J., Medina, J.M., Rodriguez Luis, F. (1976) *Anales de Quimica* **72**, 60-64.
87. Gonzalez-Hernandez, M.P., Starkey, E. E., Karchesy, J. (2000) *Journal of Chemical Ecology* **26**, 293-301.
88. Gopinath, K.W., Govindachari, T.R., Rao, U.R. (1960) *Tetrahedron* **8**, 293-295.
89. Grimes, J.W. (1997) *Australian Systematic Botany* **10**, 565-648.
90. Grundon, M.F., Chamberlain, T.R. (1971) *Journal of the Chemical Society (C Organic)* **5**, 910-914.
91. Gu, Y., Han, G. (1986) *Yaoxue Xuebao* **21**, 792-795.
92. Guenaydin, K., Savci, S. (2005) *Natural Product Research* **19**, 203-210.
93. Guiotto, A., Rodighiero, P., Quintily, U., Pastorini, G. (1976) *Phytochemistry* **15**, 348.
94. Guittonneau, G-G. (2002) *Voyages botaniques de la Société Botanique de France (La Société Botanique de France, Bibliothèque Interuniversitaire de Médecine, Paris)* [http://www.bium.univ-paris5.fr/sbf/activ\\_chypre.htm](http://www.bium.univ-paris5.fr/sbf/activ_chypre.htm).
95. Guz, N.R., Lorenz, P., Stermitz, F.R. (2001) *Tetrahedron Letters* **42**, 6491-6494.
96. Hadacek, F., Muller, C., Werner, A., Greger, H., Proksch, P. (1994) *Journal of Chemical Ecology* **20**, 2035-2054.
97. Haensel, R., Leuschke, A., Gomez-Pompa, A. (1975) *Lloydia* **38**, 529-530.
98. Haggag, E.G., Mahmoud, I.I., Abou-Moustafa, E.A., Mabry, T.J. (1999) *Asian Journal of Chemistry* **11**, 784-789.

99. Hall, T.F., Breeland, S.G., Anderson, P.K. (1969) *Annals of the Entomological Society of America* **62**, 242-244.
100. Harden, G.J. (1991) *Flora of New South Wales* (New South Wales University Press, Kensington, NSW, Australia).
101. Hart, N.K., Johns, S.R., Lamberton, J.A., Loder, J.W., Moorhouse, A., Sioumis, A.A., Smith, T.K. (1969) *Australian Journal of Chemistry* **22**, 2259-2262.
102. Hartley, T.G. (1997) *Adansonia Series* **3** **19**, 189-212.
103. Hegarty, M.P., Lahey, F.N. (1956) *Australian Journal of Chemistry* **9**, 120-131.
104. Hickey, M.J. (1948) *Journal of Organic Chemistry* **13**, 443-446.
105. Hollis, A.F., Prager, R.H., Ritchie, E., Taylor, W.C. (1961) *Australian Journal of Chemistry* **14**, 100-105.
106. Hong Kong Herbaria (2003) *Hong Kong Plant Database* (Agriculture, Fisheries and Conservation Department, Kowloon, Hong Kong) <http://www.hkherbarium.net>.
107. Hussain, R.A., Poveda, L.J., Pezzuto, J.M., Soejarto, D.D., Kinghorn, A.D. (1990) *Economic Botany* **44**, 174-282.
108. Hyde, M. and Wursten, B. (2006) *Flora of Zimbabwe*. <http://www.zimbabweflora.co.zw/index.php>.
109. Igarashi, S., Fukuda, H. (2000) *The Life Histories of Asian Butterflies Volume 2*. (Tokai University Press, Tokyo).
110. Ikeshiro, Y., Mase, I., Tomita, Y. (1994) *Phytochemistry* **35**, 1339-1341.
111. Ikonen, A., Tahvanainen, J., Roininen, H. (2002) *Chemoecology* **12**, 125-131.
112. Imeh, U., Khokhar, S. (2002) *Journal of Agricultural and Food Chemistry* **50**, 6301-6306.
113. Innocenti, G., Cappelletti, E.M., Caporale, G. (1984) *International Journal of Crude Drug Research* **22**, 97-109.
114. Ishii, H., Ishikawa, T., Lu, S.-T., Chen, I.-S. (1976) *Yakugaku Zasshi* **96**, 1458-1467.
115. Ishii, H., Ishikawa, T., Akaike, M., Tohjoh, T., Toyoki, M., Ishikawa, M., Chen, I.S., Lu, S.T. (1984) *Yakugaku Zasshi* **104**, 1030-1042.
116. Ito, C., Furukawa, H. (1987) *Chemical & Pharmaceutical Bulletin* **35**, 4277-4285.

117. Ito, C., Kondo, Y., Ruangrungsri, N., Furukawa, H. (1999) *Chemical & Pharmaceutical Bulletin* **47**, 1491-1493.
118. Ito, C., Itoigawa, M., Katsuno, S., Omura, M., Tokuda, H., Nishino, H., Furukawa, H. (2000) *Journal of Natural Products* **63**, 1218-1224.
119. Ito, C., Kondo, Y., Wu, T.-S., Furukawa, H. (2000) *Chemical & Pharmaceutical Bulletin* **48**, 65-70.
120. Ivanova, A., Kostova, I., Mikhova, B., Vitkova, A. (2004) *Dokladi na Bulgarskata Akademiya na Naukite* **57**, 45-48.
121. Jacobs, H., Seeram, N.P., Nair, M.G., Reynolds, W.F., McLean, S. (1999) *Journal of the Indian Chemical Society* **76**, 713-717.
122. Jain, R.K., Srivastava, S.D. (1992) *Proceedings of the National Academy of Sciences, India, Section A: Physical Sciences* **62**, 5-9.
123. Jim, C.Y. (2002) *Annals of Forest Science* **59**, 107-118.
124. Johns, S.R., Lambertson, J.A. (1966) *Australian Journal of Chemistry* **19**, 1991-1994.
125. Johns, S.R., Lambertson, J.A., Price, J.R. (1967) *Australian Journal of Chemistry* **20**, 2795-2797.
126. Juichi, M., Inoue, M., Aoki, K., Furukawa, H. (1986) *Heterocycles* **24**, 1595-1597.
127. Juichi, M., Kaga, H., Muraguchi, M., Inoue, M., Kajiuura, I., Omura, M., Furukawa, H. (1988) *Heterocycles* **27**, 2197-2200.
128. Jurd, L., Benson, M., Wong, R.Y. (1983) *Australian Journal of Chemistry* **36**, 759-768.
129. Kaastra, R.C. (1982) *Flora Neotropica* **33**, 1-198.
130. Kapadia, G.J., Baldwin, H.H., Shah, N.J. (1964) *Journal of Pharmacy and Pharmacology* **16**, 283-284.
131. Karawya, M.S., Mirhom, Y.W., Shehata, I.A. (1982) *Egyptian Journal of Pharmaceutical Sciences* **21**, 239-248.
132. Khalid, S.A., Waterman, P.G. (1982) *Journal of Natural Products* **45**, 343-346.
133. Khalid, S.A., Waterman, P.G. (1985) *Journal of Natural Products* **48**, 118-119.
134. Khan, N.D., Naqvi, S.W.I. (1988) *Journal of Scientific & Industrial Research* **47**, 543-546.
135. Kopp, L.E. (1966) *Memoirs of the New York Botanical Garden* **14**, 1-117.
136. Korol, V.V. (2003) *Medichma Khimiya* **5**, 110-113.



137. Kress, W.J., R.A. DeFilipps, E. Farr, and D.Y.Y. Kyi (2003) *Contributions from the United States National Herbarium* **45**, 1-590.
138. Lahey, F.N., Wluka, D.J. (1955) *Australian Journal of Chemistry* **8**, 125-128.
139. Latif, Z., Hartley, T.G., Rice, M.J., Waigh, R.D., Waterman, P.G. (1998) *Biochemical Systematics and Ecology* **26**, 467-468.
140. Latif, Z., Hartley, T.G., Rice, M.J., Waigh, R.D., Waterman, P.G. (1998) *Journal of Natural Products* **61**, 614-619.
141. Lee, K.-H., Soine, T.O. (1968) *Journal of Pharmaceutical Sciences* **57**, 865-868.
142. Lemmich, J., Havelund, S. (1978) *Phytochemistry* **17**, 139-141.
143. Lemmich, J., Shabana, M. (1984) *Phytochemistry* **23**, 863-865.
144. Li, H.-L. (1977) in *Flora of Taiwan, volume 3*, eds. Li, H.-L. (Epoch Publishing, Taiwan), pp. 565-573.
145. Li, S.-H., Wu, S.-L., Li, W.-S. (1996) *Chinese Pharmaceutical Journal (Taipei)* **48**, 367-373.
146. Lindroth, R.L., Hsia, M.T.S., Scriber, J.M. (1987) *Biochemical Systematics and Ecology* **15**, 681-686.
147. Lindroth, R.L., Kinney, K.K., Platz, C.L. (1993) *Ecology* **74**, 763-777.
148. Lopez, J.A., Barillas, W., Gomez-Laurito, J., Lin, F.-T., Al-Rehaily, A.J., Sharaf, M.H.M., Schiff, P.L., Jr. (1995) *Planta Medica* **61**, 198.
149. Lundell, C.L. (1974) *Wrightia* **5**, 23-44.
150. Maiden, J.H. (1889) *The useful native plants of Australia (including Tasmania)* (The Technological Museum of New South Wales, Sydney).
151. Maksudov, M.S., Umarova, R.U., Saatov, Z. (1995) *Khimiya Prirodnikh Soedinenii* **5**, 753-754.
152. Manguro L.O.A., Ugi I., Lemmen P., Hermann R. (2003) *Phytochemistry* **64**, 891-896.
153. Martin, J.M., Madigosky, S.R., Gu, Z., Zhou, D., Wu, J., McLaughlin, J.L. (1999) *Journal of Natural Products* **62**, 2-4.
154. Maxwell, A., Dabideen, D., Reynolds, W.F., McLean, S. (1998) *Journal of Natural Products* **61**, 815-816.

155. McCaughey, W.F., Buehrer, T.F. (1961) *Journal of Pharmaceutical Sciences* **50**, 658-660.
156. McHale, D., Khopkar, P.P., Sheridan, J.B. (1987) *Phytochemistry* **26**, 2547-2549.
157. Miksch, M., Boland, W. (1996) *Experientia* **52**, 739-743.
158. Misirli, A. (2000) *Ege Universitesi Ziraat Fakultesi Dergisi* **37**, 153-160.
159. Modafar, C.El., Clerivet, A., Fleuriot, A., Macheix, J.J. (1992) *Bulletin de Liaison - Groupe Polyphenols* **16**, 292-296.
160. Mohamed, T.K. (2004) *Asian Journal of Chemistry* **16**, 1753-1764.
161. Moldt, P., Smitt, U.W., Broegger C.S. (1987) *Journal of Natural Products* **50**, 974-975.
162. Mongelli, E., Coussio, J., Ciccica, G. (2002) *Phytotherapy research: PTR* **16**, S71-S72.
163. Moraea, P.L.R. and M.T.V.C. Derbyshire (2003) *Biota Neotropica* **2**, 1-19.
164. Moreno, P.R.H., Von Poser, G.L., Rates, S.M.K., Yoshida, M., Gottlieb, O.R., Souza, I.A., Henriques, A.T. (1993) *International Journal of Pharmacognosy* **31**, 189-192.
165. Moustafa, S.M.I., El-Shamy, A.A., El-Shamy, I.M. (1984) *Fitoterapia* **55**, 251-253.
166. Mukherjee, M., Mukherjee, S., Shaw, A.K., Ganguly, S.N. (1983) *Phytochemistry* **22**, 2328-2329.
167. Murayama, Y. (1921) *Yakugaku Zasshi* **475**, 786-790.
168. Murphy, E.M., Nahar, L., Byres, M., Shoeb, M., Siakalima, M., Rahman, M. M., Gray, A.I., Sarker, S.D. (2004) *Biochemical Systematics and Ecology* **32**, 203-207.
169. Nakatani, M., Takao, H., Iwashita, T., Naoki, H., Hase, T. (1988) *Phytochemistry* **27**, 1429-1432.
170. Nakatani, M., Ishiba, K., Fujimoto, K., Hase, T. (1991) *Kagoshima Daigaku Rigakubu Kiyo, Sugaku, Buisurigaku, Kagaku* **24**, 81-86.
171. Nakatsu, T., Johns, T., Kubo, I., Milton, K., Sakai, M., Chatani, K., Saito, K., Yamagiwa, Y., Kamikawa, T. (1990) *Journal of Natural Products* **53**, 1508-1513.

172. Napolitano, H.B., Silva, M., Ellena, J., Rodrigues, B.D.G., Almeida, A.L.C., Vieira, P.C., Oliva, G., Thiemann, O.H. (2004) *Brazilian Journal of Medical and Biological Research* **37**, 1847-1852.
173. Narasimhachari, N., Von Rudloff, E. (1973) *Phytochemistry* **12**, 2551-2552.
174. National Herbarium of New South Wales. (2006) *New South Wales Flora Online* (Royal Botanic Gardens & Domain Trust, Sydney) <http://plantnet.rbgsyd.nsw.gov.au/floraonline.htm>.
175. Naves, Y.R., Alves, H.M., Arndt, V.H., Gottlieb, O.R., Magalhaes, M.T. (1963) *Helvetica Chimica Acta* **46**, 1056-1059.
176. Nelson, R.B., North, D.S., Kaneriyia, M., Fletcher, C.V. (1978) *Proceedings of the Western Pharmacology Society* **21**, 137-139.
177. New York Botanical Gardens. (2003) *Virtual Herbarium* (International Plant Sciences Center, New York Botanical Gardens, Bronx, NY) <http://sciweb.nybg.org/science2/VirtuallHerbarium.asp>.
178. Ngadjui, B.T., Ayafor, J.F., Sondengam, B.L., Connolly, J.D. (1989) *Journal of Natural Products* **52**, 243-247.
179. Nguyen, Q.A., Van-Dufat, H.T., Michel, S., Tilleguin, F., Dumontet, V., Sevenet, T. (2002) *Zeitschrift fuer Naturforschung, C: Journal of Biosciences* **57**, 986-989.
180. Nishida, R., Weintraub, J.D., Feeny, P., Fukami, H. (1993) *Journal of Chemical Ecology* **19**, 1587-1594.
181. Nitao, J.K., Johnson, K.S., Scriber, J.M., Nair, M.G. (1992) *Journal of Chemical Ecology* **18**, 1661-1671.
182. Oertli, E.H., Beier, R.C., Ivie, G.W., Rowe, L.D. (1984) *Phytochemistry* **23**, 439-441.
183. Ogawa, K., Kawasaki, A., Omura, M., Yoshida, T., Ikoma, Y., Yano, M. (2001) *Phytochemistry* **57**, 737-742.
184. Ohwi, J. (1965) *Flora of Japan* (Smithsonian Institution, Washington, D.C.).
185. Ojala, T., Vuorela, P., Kiviranta, J., Vuorela, H., Hiltunen, R. (1999) *Planta Medica* **65**, 715-718.
186. Olszewska-Kaczynska, I., Jaroszewska, I. (1999) *Herba Polonica* **45**, 173-178.
187. Ordaz-Galindo, A., Wesche-Ebeling, P., Wrolstad, R.E., Rodriguez-Saona, L., Argaiiz-Jamet, A. (1999) *Food Chemistry* **65**, 201-206.

188. Oregon State University. (2006) *Food Resource* (College of Health and Human Services, Oregon State University, Corvallis, OR) <http://food.oregonstate.edu/v/carrotw.html>.
189. Oxford University Herbarium. (2006) *Plant Collection Database* (University of Oxford, Oxford, UK) <http://herbaria.plants.ox.ac.uk>.
190. Pala-Paul, J., Velasco-Negueruela, A., Perez-Alonso, M.J., Ramos-Vazquez, P. (2002) *Journal of Essential Oil Research* **14**, 206-209.
191. Pala-Paul J., Garcia-Jimenez R., Perez-Alonso M.J., Velasco-Negueruela A., Sanz J. (2004) *Journal of chromatography A* **1036**, 245-247.
192. Parker, R.N. (1973) *A forest flora for the Punjab with Hazara and Delhi* (Periodical Experts, Delhi).
193. Parmar, V.S., Jain, S.C., Gupta, S., Talwar, S., Rajwanshi, V.K., Kumar, R., Azim, A., Malhotra, S., Kumar, N., Jain, R., Sharma, N.K., Tyagi, O.D., Lawrie, S.J., Errington, W., Howarth, O.W., Olsen, C.E., Singh, S.K., Wengel, J. (1998) *Phytochemistry* **49**, 1069-1078.
194. Pearl, I.A., Darling, S.F. (1971) *Phytochemistry* **10**, 2844-2847.
195. Penfold, A.R. (1930) *Journal and Proceedings of the Royal Society of New South Wales* **64**, 83-88.
196. Picker, K., Ritchie, E., Taylor, W.C. (1976) *Australian Journal of Chemistry* **29**, 2023-2036.
197. Pirani, J.R. (1995) in *Flora of the Pico das Almas*, eds. B.L. Stannard. (Royal Botanic Gardens, Kew), pp. 579-580.
198. Pistelli, L., Bertoli, A., Morelli, I., Scarpato, R. (1998) *Recent Research Developments in Phytochemistry* **2(Pt. 2)**, 463-483.
199. Price, P.W., Waring, G.L., Julkunen-Tiitto, R., Tahvanainen, J., Mooney, H.A., Craig, T.P. (1989) *Journal of Chemical Ecology* **15**, 1117-1131.
200. Prista, L.N., Alves, A.C. (1961) *Garcia de Orta* **9**, 501-508.

201. Rahmani, M., Susidarti, R.A., Ismail, H.B.M., Sukari, M.A., Hin, T.-Y.Y., Lian, G.E.C., Ali, A.M., Kulip, J., Waterman, P.G. (2003) *Phytochemistry* **64**, 873-877.
202. Rao, G., Dai, Y., Zhang, F., Cai, F., Sun, H. (1991) *Yunnan Zhiwu Yanjiu* **13**, 209-215.
203. Raoul, W., Iachan, A. (1950) *Revista de Quimica Industrial (Rio de Janeiro)* **19**, 12-15.
204. Rehill, B., Clauss, A., Wieczorek, L., Whitham, T., Lindroth, R. (2005) *Biochemical Systematics and Ecology* **33**, 125-131.
205. Reichardt, P.B., Merken, H.M., Clausen, T.P., Wu, J. (1992) *Journal of Natural Products* **55**, 970-973.
206. Reisch, J., Podpetschnig, E. (1987) *Pharmazie* **42**, 745.
207. Renner, S.S., H. Balslev, L.B. Holm-Nielsen. (1990) *AAU Reports* **24**, 1-241.
208. Rey, C. (2006) *Endangered Species of South Carolina* (Department of Pesticide Regulation, Clemson University, Pendleton, SC) <http://dpr.clemson.edu/SpecialPrograms/Endangered/dropwort.htm>.
209. Ricklefs, R.E., Matthew, K.K. (1982) *Canadian Journal of Botany* **60**, 2037-2045.
210. Ridley, H.N. (1967) *The Flora of the Malay Peninsular* (A. Asher & Co., Amsterdam).
211. Rieske, L.K., Raffa, K.F. (1998) *Journal of Chemical Ecology* **24**, 501-523.
212. Roberts, D.D. (2002) *Pesticidal compositions from foliage and stems of Prunus species* (Premier Botanicals Ltd., USA), ).
213. Romani, A., Pinelli, P., Mulinacci, N., Vincieri, F.F., Gravano, E., Tattini, M. (2000) *Journal of Agricultural and Food Chemistry* **48**, 4091-4096.
214. Runkel, M., Bourian, M., Legrum, W. (1997) *Fruit Processing* **7**, 213-216.
215. Saenz, J.A., Nassar M. (1967) *Revista de Biologia Tropical* **15**, 195-202.
216. Sagova, L.I., Kuznjecova, G.A., Pavlovic, S.D., Nikolic, R.T. (1980) *Acta Pharmaceutica Jugoslavica* **30**, 93-95.
217. Santamour, F.S., Jr. (1998) *Phytochemistry* **47**, 1537-1538.
218. Santos, B.V.d.O., Chaves, E.V.L.d.-C.M.C.d.O., Gray, A.I. (1998) *Phytochemistry* **49**, 1381-1384.

219. Sato, T., Osawa, K., Ueda, J. (1985) *Annual Report of the Tohoku College of Pharmacy* **32**, 125-127.
220. Schofield, J.A., Hagerman, A.E., Harold, A. (1998) *Journal of Chemical Ecology* **24**, 1409-1421.
221. Schramm, L.C. (1978) *Lloydia* **41**, 381-382.
222. Sergeeva, N.V., Bandyukova, V.A., Shapiro, D.K., Narizhnaya, T.I., Anikhimovskaya, L.V. (1980) *Khimiya Prirodnikh Soedinenii* **5**, 726-728.
223. Shah, N.C. (1991) *Journal of Essential Oil Research* **3**, 467-468.
224. Sharma, V., Vaid, N. (1997) *Indian Journal of Plant Physiology* **2**, 207-210.
225. Sharma, P.N., Shoeb, A., Kapil, R.S., Popli, S.P. (1979) *Indian Journal of Chemistry, Section B: Organic Chemistry Including Medicinal Chemistry* **17B**, 299-300.
226. Sheen, W.S., Tsai, I.L., Teng, C.M., Chen, I.S. (1994) *Phytochemistry* **36**, 213-215.
227. Shen, Y., Jiang, H., Nie, S., Zu, Y., Takada, K., Tamai, Y., Terazawa, M. (2000) *Enshurin Kenkyu Hokoku (Hokkaido Daigaku Nogakubu)* **57**, 53-65.
228. Shieh, J.-C. (2003) *Taiwan Linye Kexue* **18**, 329-338.
229. Shishkin, B.K. (ed) (1951) *Flora of the USSR. Volume XVII. Umbelliflorae (continued)* (Israel Program for Scientific Translations).
230. Shoeb, A., Kapil, R.S., Popli, S.P. (1973) *Phytochemistry* **12**, 2071-2072.
231. Silva, B.M., Andrade, P.B., Goncalves, A.C., Seabra, R.M., Oliveira, M.B., Ferreira, M.A. (2004) *European Food Research and Technology* **218**, 385-389.
232. Sivakumaran, M., Gopinath, K.W. (1976) *Indian Journal of Chemistry, Section B: Organic Chemistry Including Medicinal Chemistry* **14B**, 150-151.
233. Smith, C.K., F.A. Oliveira, H.L. Gholz, and A. Baima (2002) *Forest Ecology and Management* **164**, 257-263.

234. Sosef, M. S. M., Noordelos, M. E., ter Steege, H., and Roos, M. C. (2006) *Collections Database* (National Herbarium of the Netherlands, Wageningen, The Netherlands) <http://www.nationaalherbarium.nl>.
235. Stace, C., van der Meijden, R. and de Kort, I. (2001) *Interactive Flora of NW Europe* (Netherlands Biodiversity Information Facility, Amsterdam, The Netherlands) <http://ip30.eti.uva.nl/BIS/flora.php?menuentry=inleiding>.
236. Stefanello, M.E.A., Alvarenga, M.A., Toma, I.N. (2002) *Fitoterapia* **73**, 135-139.
237. Stone, B.C. (1985) in *A revised handbook to the flora of Ceylon. volume 5*, eds. Dassanayake, M.D. (Amerind Publishing Co. Pvt. Ltd., New Delhi), pp. 406-476.
238. Stoneman, B. (1915) *Plants and their ways in South Africa* (Longmans, Green and Co., London).
239. Sukari, M.A., Salim, W.S.W., Ibrahim, N.H., Rahmani, M., Aimi, N., Kitajima, M. (1999) *Fitoterapia* **70**, 197-199.
240. Sultana, N., Waterman, P.G. (2001) *Phytochemistry* **58**, 329-332.
241. Sultana, N., Sarker, S.D., Armstrong, J.A., Wilson, P.G., Waterman, P.G. (2003) *Biochemical Systematics and Ecology* **31**, 681-691.
242. Sun, G.C. (1974) *Alkaloids and coumarins from various plant parts of Zanthoxylum americanum Miller*. (Dissertation, University of Toledo, Toledo, OH).
243. Swingle, W.T. and P.C. Reece (1967) in *The Citrus Industry*, eds. Reuther, W., H. Webber, and L. Batchelor. (University of California), pp. 190-430.
244. Takahashi, M., Sato, T. (1979) *Annual Report of the Tohoku College of Pharmacy* **26**, 45-47.
245. Takenaka, Y., Tanahashi, T., Shintaku, M., Sakai, T., Nagakura, N., Parida. (2000) *Phytochemistry* **55**, 275-284.
246. Talapatra, S.K., Dutta, S., Talapatra, B. (1973) *Phytochemistry* **12**, 729-730.
247. Tatum, J.H., Hearn, C.J.; Berry, R.E. (1978) *Journal of the American Society for Horticultural Science* **103**, 492-496.
248. Termonia, A., Pasteels, J.M. (1999) *Chemoecology* **9**, 13-23.

249. Thompson, E.B., Aynilian, G.H., Dobberstein, R.H., Cordell, G.A., Fong, H.H.S., Farnsworth, N.R. (1979) *Journal of Natural Products* **42**, 120-125.
250. Tinto, W.F., Blair, L.C., Reynolds, W.F., McLean, S. (1992) *Journal of Natural Products* **55**, 701-706.
251. Tiwari, K.P., Masood, M. (1978) *Phytochemistry* **17**, 1068-1069.
252. Tomita, M., Ishii, H. (1957) *Yakugaku Zasshi* **77**, 810-812.
253. Tosun, A., Ozkal, N. (2003) *Ankara Universitesi Eczacilik Fakultesi Dergisi* **32**, 269-284.
254. Townsend, C.C. (1967) in *Flora of Turkey and the East Aegean Islands. volume 2*, eds. Davis, P.H. (Edinburgh University Press, Edinburgh), pp. 297.
255. Treutter, D., Feucht, W. (1985) *Mitteilungen Klosterneuburg* **35**, 256-260.
256. Tucker, A.O., M.J. Maciarello, and M. Hill (1992) *Economic Botany* **46**, 21-24.
257. Tucker, A.O., Maciarello, M.J., Wofford, B.E., Dennis, W.M. (1997) *Journal of Essential Oil Research* **9**, 209-211.
258. Tutin, T.G. (1968) *Flora Europaea, volume 2* (Cambridge University Press, Cambridge).
259. UC Regents (2003) *The Citrus Variety Collection* (College of Natural and Agricultural Sciences, University of California, Riverside, CA) <http://www.citrusvariety.ucr.edu/index.html>.
260. University Botanical Gardens (2005) *Plant Database*. <http://www.botanic.co.il>.
261. USDA, NRCS (2006) *The PLANTS Database* (National Plant Data Center, Baton Rouge, LA) <http://plants.usda.gov>.
262. Valencienes, E., Smadja, J., Conan, J.Y. (1998) *Rivista Italiana EPPOS (Spec. Num.)*, 716-723.
263. Van Wagenen, B.C., Huddleston, J., Cardellina, J.H., II. (1988) *Journal of Natural Products* **51**, 136-141.
264. Vereskovskii, V.V., Kuznetsova, Z.P., Loznukho, I.V., Sokolov, I.V., Osokin, D.M. (1992) *Khimiya Prirodnykh Soedinenii* **6**, 724-726.
265. Vierling, B., Hartmann, W., Stoesser, R. (1992) *Angewandte Botanik* **66**, 7-13.



266. Walker, E.H. (1976) *Flora of Okinawa and Southern Ryukyu Islands* (Smithsonian Institution, Washington, D.C.).
267. Wang, Y., Yong, J., Wang, Z. (2002) *Zhongcaoyao* **33**, 666-670.
268. Wattanapiromsakul, C., Waterman, P.G. (2000) *Phytochemistry* **55**, 269-273.
269. Weinstein, B., Craig, A.R., Fuller, L.W., Kang, J.-B., McBreen, S.A. (1972) *Phytochemistry* **11**, 1530.
270. Weston, P.H. and G.J. Harden (2002) in *Flora of New South Wales*, eds. G.J. Harden. (New South Wales University Press, Kensington, NSW, Australia), pp. 292-299.
271. White, F. (1962) *Forest Flora of Northern Rhodesia* (Oxford University Press, Oxford).
272. Williams, D. (1970) *Phytochemistry* **9**, 2247.
273. Wondimu, A., Dagne, E., Waterman, P.G. (1988) *Phytochemistry* **27**, 959-960.
274. World Agroforestry Centre (2006) *AgroForestryTree Database* (International Center for Research in Agroforestry) <http://www.worldagroforestry.org/sea/Products/AFDbases/AF/index.asp>.
275. Wu, T.S. (1987) *Phytochemistry* **26**, 3094-3095.
276. Wu, T.S. (1998) *Phytochemistry* **27**, 3717-3718.
277. Wu, T.S., Kuoh, C.S., Furukawa, H. (1983) *Chemical & Pharmaceutical Bulletin* **31**, 895-900.
278. Wunderlin, R. P., and B. F. Hansen (2004) *Atlas of Florida Vascular Plants* (Institute for Systematic Botany, University of South Florida, Tampa, FL) <http://www.plantatlas.usf.edu>.
279. Yakushijin, K., Sugiyama, S., Mori, Y., Murata, H., Furukawa, H. (1980) *Phytochemistry* **19**, 161-162.
280. Yang, M.H., Blunden, G., Patel, A.V., O'Neill, M.J., Lewis, J.A. (1994) *Planta Medica* **60**, 390.
281. Yoo, S.W., Kim, J.S., Kang, S.S., Son, K.H., Chang, H.W., Kim, H.P., Bae, K.H., Lee, C.-O. (2002) *Archives of Pharmacal Research* **25**, 824-830.
282. Yost, G.S., Stermitz, F.R., Williams, M.C. (1977) *Phytochemistry* **16**, 1097.

283. Yusa, T., Matsubara, Y., Sawabe, A., Iizuka, Y., Okamoto, K. (1992) *Yukagaku* **41**, 249-251.
284. Zaidi, S.T.H., Gupta, G.N. (1961) *Indian Oil and Soap Journal* **27**, 103-106.
285. Zaugg, S.E., Cefalo, D., Walker, E.B. (1997) *Journal of Chromatography A* **781**, 487-490.
286. Zembower, D.E., Lin, Y.-M., Flavin, M.T., Chen, F.-C., Korba, B.E. (1998) *Antiviral Research* **39**, 81-88.
287. Zhang, J., El-Shabrawy, A.R.O., El-Shanawany, M.A.; Schiff, P.L. Jr., Slatkin, D.J. (1987) *Journal of Natural Products* **50**, 800-806.
288. Zhengyi W. and Raven, P.H. (2004) *Flora of China* (Science Press, Beijing & Missouri Botanical Garden, St. Louis, MO) [http://www.efloras.org/flora\\_page.aspx?flora\\_id=2](http://www.efloras.org/flora_page.aspx?flora_id=2).
289. Zielinska-Sowicka, R., Gudej, J. (1973) *Acta Poloniae Pharmaceutica* **30**, 553.
290. Ziyaev, R., Ikramov, K., Kadyrov, Kh.A., Abdusamatov, A. (1991) *Khimiya Prirodnykh Soedinenii* **4**, 587-588.
291. Zobel, A.M., Wang, J., March, R.E., Brown, S.A. (1991) *Journal of Chemical Ecology* **17**, 1859-1870.
